# Supplementary material
Source: HighWire-hosted journal article supplement (https://bjsm.bmj.com/content/58/5/278)
Supplement: inline-supplementary-material-1 [file inline-supplementary-material-1.pdf]

**Supplementary Table 1.** Search strategy.**PubMed Search – Run 9/14/2023**

| Search | Query                                                                                                                                                                                                                                                                                                                                                                                                                                                                                                                                                                                                                                                                                                                                                                                                                                                                                                                                                                                                                                                                                                                                      | Items Found |
|--------|--------------------------------------------------------------------------------------------------------------------------------------------------------------------------------------------------------------------------------------------------------------------------------------------------------------------------------------------------------------------------------------------------------------------------------------------------------------------------------------------------------------------------------------------------------------------------------------------------------------------------------------------------------------------------------------------------------------------------------------------------------------------------------------------------------------------------------------------------------------------------------------------------------------------------------------------------------------------------------------------------------------------------------------------------------------------------------------------------------------------------------------------|-------------|
| 1      | “Female”[Mesh] OR “women”[Mesh] OR “female”[tw] OR “females”[tw] OR “women”[tw] OR “woman”[tw] OR “woman-identified”[tw] OR “women-identified”[tw] OR “women-identifying”[tw] OR “woman-identifying”[tw] OR “female-identifying”[tw] OR “female-identified”[tw] OR “woman identified”[tw] OR “women identified”[tw] OR “women identifying”[tw] OR “woman identifying”[tw] OR “female identifying”[tw] OR “female identified”[tw]                                                                                                                                                                                                                                                                                                                                                                                                                                                                                                                                                                                                                                                                                                           | 10,073,516  |
| 2      | ((student[tw] OR college[tw] OR collegiate[tw] OR OR intercollegiate[tw] OR intramural[tw] OR club[tw] OR university [tw] OR varsity [tw]) AND (athlete [tw] OR athletes [tw] OR athletics [tw] OR sport [tw] OR sports [tw])) OR (“athletes/psychology”[Mesh] OR “NCAA”[tw] OR “Athletic Coast Conference” [tw] OR “Big 10”[tw] OR “Southeastern Conference” [tw] OR “Pac 12”[tw] OR “Big 12”[tw] OR “NAIA”[tw] OR “National Collegiate Athletic Association”[tw] OR “National Association of Intercollegiate Athletics”[tw]))                                                                                                                                                                                                                                                                                                                                                                                                                                                                                                                                                                                                            | 18,531      |
| 3      | ((common-mental-disorder[tw] OR common-mental-disorders[tw] OR depression[tw] OR depressive-disorder[tw] OR depressive-disorders[tw] OR mood-disorder[tw] OR mood-disorders[tw] OR anxiety[tw] OR generalized-anxiety-disorder[tw] OR acute-stress-disorder[tw] OR acute-stress-disorders[tw] OR traumatic-stress-disorder[tw] OR traumatic-stress-disorders[tw] OR post-traumatic-stress-disorder[tw] OR posttraumatic-stress-disorder[tw] OR post-traumatic-stress-disorders[tw] OR posttraumatic-stress-disorders[tw] OR PTSD[tw] OR posttraumatic-neuroses[tw] OR post-traumatic-neuroses[tw] OR post-traumatic-neuroses[tw]) AND (diagnosis[tw] OR diagnose*[tw] OR disorder[tw] OR disorders[tw] OR psychiatr*[tw] OR psychotherap*[tw] OR psycholog*[tw] OR cognitive-behavioral-therapy[tw] OR cognitive-behavioural-therapy[tw] OR clinical[tw] or clinically[tw] OR baseline[tw] OR pre-existing[tw])) OR (Depressive Disorder[Majr] OR Depressive Disorder, Major[Majr] OR Anxiety Disorders[Majr] OR Stress Disorders, Traumatic[Majr] OR Stress Disorders, Traumatic, Acute[Majr] OR Stress Disorders, Post Traumatic[Majr])) | 622,399     |
| 4      | 1 AND 2 AND 3                                                                                                                                                                                                                                                                                                                                                                                                                                                                                                                                                                                                                                                                                                                                                                                                                                                                                                                                                                                                                                                                                                                              | 496         |

PubMed before duplicate removal: 496

PubMed after duplicate removal: 495

**CINAHL Plus with Full Text Search – Run 9/14/2023**

| Search | Query                                                                                                                                                                                                                                                                                                                                                                                                                                                                                                                                                                                                                                                                                                                                                                                                                                                                                                                                                     | Items Found |
|--------|-----------------------------------------------------------------------------------------------------------------------------------------------------------------------------------------------------------------------------------------------------------------------------------------------------------------------------------------------------------------------------------------------------------------------------------------------------------------------------------------------------------------------------------------------------------------------------------------------------------------------------------------------------------------------------------------------------------------------------------------------------------------------------------------------------------------------------------------------------------------------------------------------------------------------------------------------------------|-------------|
| 1      | MH (female OR women OR woman OR female) OR AB (female OR females OR women OR woman OR woman-identified OR women-identified OR women-identifying OR woman-identifying OR female-identifying OR female-identified OR “woman identified” OR “women identified” OR “women identifying” OR “woman identifying” OR “female identifying” OR “female identified”) OR TI (female OR females OR women OR woman OR woman-identified OR women-identified OR women-identifying OR woman-identifying OR female-identifying OR female-identified OR “woman identified” OR “women identified” OR “women identifying” OR “woman identifying” OR “female identifying” OR “female identified”)                                                                                                                                                                                                                                                                               | 2,398,022   |
| 2      | (MM “Athletes, College”) OR (MM “Athletes, Female”) OR ((student OR college OR collegiate OR intercollegiate OR intramural OR club OR university OR varsity) AND (athlete OR athletes OR athletics OR sport OR sports)) OR NCAA OR "Athletic Coast Conference" OR "Big 10" OR "Southeastern Conference" OR "Pac 12" OR "Big 12" OR NAIA OR "National Collegiate Athletic Association" OR "National Association of Intercollegiate Athletics"                                                                                                                                                                                                                                                                                                                                                                                                                                                                                                              | 27,117      |
| 3      | (MM “Mental Disorders/DI”) OR (MM “Stress, Psychological”) OR (MH “Mental Health”) OR (MH “Depression/DI/PF”) OR (MM "Anxiety/DI/CL/PF") OR (MM "Anxiety Disorders/DI/CL/PF") OR ((common-mental-disorder OR common-mental-disorders OR depression OR depressive-disorder OR depressive-disorders OR mood-disorder OR mood-disorders OR anxiety OR generalized-anxiety-disorder OR acute-stress-disorder OR acute-stress-disorders OR traumatic-stress-disorder OR traumatic-stress-disorders OR post-traumatic-stress-disorder OR posttraumatic-stress-disorder OR post-traumatic-stress-disorders OR posttraumatic-stress-disorders OR PTSD OR posttraumatic-neuroses OR post-traumatic-neuroses OR post-traumatic-neuroses) AND (diagnosis OR diagnose* OR disorder OR disorders OR psychiatr* OR psychotherap* OR psycholog* OR cognitive-behavioral-therapy OR cognitive-behavioural-therapy OR clinical OR clinically OR baseline OR pre-existing)) | 301,984     |
| 4      | 1 AND 2 AND 3                                                                                                                                                                                                                                                                                                                                                                                                                                                                                                                                                                                                                                                                                                                                                                                                                                                                                                                                             | 421         |

CINAHL before duplicate removal: 421

CINAHL after duplicate removal: 317

**PsychINFO Search – Run 9/14/2023**

| Search | Query                                                                                                                                                                                                                                                                                                                                                                                                                                                                                                                                                                                                                                                                                                                                                                                                                                                                                                                                                                                                                                                                                                                                                                                                                                                                                                                                                                                                                                                                                                                                                                                                                                                                                                                       | Items Found |
|--------|-----------------------------------------------------------------------------------------------------------------------------------------------------------------------------------------------------------------------------------------------------------------------------------------------------------------------------------------------------------------------------------------------------------------------------------------------------------------------------------------------------------------------------------------------------------------------------------------------------------------------------------------------------------------------------------------------------------------------------------------------------------------------------------------------------------------------------------------------------------------------------------------------------------------------------------------------------------------------------------------------------------------------------------------------------------------------------------------------------------------------------------------------------------------------------------------------------------------------------------------------------------------------------------------------------------------------------------------------------------------------------------------------------------------------------------------------------------------------------------------------------------------------------------------------------------------------------------------------------------------------------------------------------------------------------------------------------------------------------|-------------|
| 1      | MA (female OR women OR woman OR female) OR AB (female OR females OR women OR woman OR woman-identified OR women-identified OR women-identifying OR woman-identifying OR female-identifying OR female-identified OR “woman identified” OR “women identified” OR “women identifying” OR “woman identifying” OR “female identifying” OR “female identified”) OR TI (female OR females OR women OR woman OR woman-identified OR women-identified OR women-identifying OR woman-identifying OR female-identifying OR female-identified OR “woman identified” OR “women identified” OR “women identifying” OR “woman identifying” OR “female identifying” OR “female identified”)                                                                                                                                                                                                                                                                                                                                                                                                                                                                                                                                                                                                                                                                                                                                                                                                                                                                                                                                                                                                                                                 | 1,288,141   |
| 2      | DE "College Athletes" OR DE "Athlete Mental Health" OR DE "Athletic Identity" OR ((student OR college OR collegiate OR intercollegiate OR intramural OR club OR university OR varsity) AND (athlete OR athletes OR athletics OR sport OR sports)) OR NCAA OR "Athletic Coast Conference" OR "Big 10" OR "Southeastern Conference" OR "Pac 12" OR "Big 12" OR NAIA OR "National Collegiate Athletic Association" OR "National Association of Intercollegiate Athletics"                                                                                                                                                                                                                                                                                                                                                                                                                                                                                                                                                                                                                                                                                                                                                                                                                                                                                                                                                                                                                                                                                                                                                                                                                                                      | 66,839      |
| 3      | DE "Anxiety Disorders" OR DE "Stress and Trauma Related Disorders" OR (DE "Major Depression" OR DE "Recurrent Depression" OR DE "Depression (Emotion)") OR TI ((common-mental-disorder OR common-mental-disorders OR depression OR depressive-disorder OR depressive-disorders OR mood-disorder OR mood-disorders OR anxiety OR generalized-anxiety-disorder OR acute-stress-disorder OR acute-stress-disorders OR traumatic-stress-disorder OR traumatic-stress-disorders OR post-traumatic-stress-disorder OR posttraumatic-stress-disorder OR post-traumatic-stress-disorders OR posttraumatic-stress-disorders OR PTSD OR posttraumatic-neuroses OR post-traumatic-neuroses OR post-traumatic-neuroses) AND (diagnosis OR diagnose* OR disorder OR disorders OR psychiatr* OR psychotherap* OR psychologist* OR cognitive-behavioral-therapy OR cognitive-behavioural-therapy OR clinical OR clinically OR baseline OR pre-existing)) OR AB ((common-mental-disorder OR common-mental-disorders OR depression OR depressive-disorder OR depressive-disorders OR mood-disorder OR mood-disorders OR anxiety OR generalized-anxiety-disorder OR acute-stress-disorder OR acute-stress-disorders OR traumatic-stress-disorder OR traumatic-stress-disorders OR post-traumatic-stress-disorder OR posttraumatic-stress-disorder OR post-traumatic-stress-disorders OR posttraumatic-stress-disorders OR PTSD OR posttraumatic-neuroses OR post-traumatic-neuroses OR post-traumatic-neuroses) AND (diagnosis OR diagnose* OR disorder OR disorders OR psychiatr* OR psychotherap* OR psychologist* OR cognitive-behavioral-therapy OR cognitive-behavioural-therapy OR clinical OR clinically OR baseline OR pre-existing)) | 389,837     |
| 4      | 1 AND 2 AND 3                                                                                                                                                                                                                                                                                                                                                                                                                                                                                                                                                                                                                                                                                                                                                                                                                                                                                                                                                                                                                                                                                                                                                                                                                                                                                                                                                                                                                                                                                                                                                                                                                                                                                                               | 1,167       |

PsychINFO before duplicate removal: 1167

PsychINFO after duplicate removal: 1047

**SportDiscus Search – Run 9/14/2023**

| Search | Query                                                                                                                                                                                                                                                                                                                                                                                                                                                                                                                                                                                                                                                                                                                                                                                                                                                                                                                       | Items Found |
|--------|-----------------------------------------------------------------------------------------------------------------------------------------------------------------------------------------------------------------------------------------------------------------------------------------------------------------------------------------------------------------------------------------------------------------------------------------------------------------------------------------------------------------------------------------------------------------------------------------------------------------------------------------------------------------------------------------------------------------------------------------------------------------------------------------------------------------------------------------------------------------------------------------------------------------------------|-------------|
| 1      | SU (female OR women OR woman OR female) OR AB (female OR females OR women OR woman OR woman-identified OR women-identified OR women-identifying OR woman-identifying OR female-identifying OR female-identified OR “woman identified” OR “women identified” OR “women identifying” OR “woman identifying” OR “female identifying” OR “female identified”) OR TI (female OR females OR women OR woman OR woman-identified OR women-identified OR women-identifying OR woman-identifying OR female-identifying OR female-identified OR “woman identified” OR “women identified” OR “women identifying” OR “woman identifying” OR “female identifying” OR “female identified”)                                                                                                                                                                                                                                                 | 229,694     |
| 2      | DE "COLLEGE athletes" OR DE "WOMEN college athletes" OR DE "MENTAL health of athletes" OR (AB (student OR college OR collegiate OR intercollegiate OR intramural OR club OR university OR varsity) AND AB (athlete OR athletes OR athletics OR sport OR sports)) OR (TI (student OR college OR intercollegiate OR intramural OR club OR university OR varsity) AND TI (athlete OR athletes OR athletics OR sport OR sports)) OR NCAA OR "Athletic Coast Conference" OR "Big 10" OR "Southeastern Conference" OR "Pac 12" OR "Big 12" OR NAIA OR "National Collegiate Athletic Association" OR "National Association of Intercollegiate Athletics"                                                                                                                                                                                                                                                                           | 120,046     |
| 3      | DE "PSYCHOLOGICAL stress" OR DE "MENTAL health of athletes" OR DE "MENTAL depression" OR DE "DEPRESSION in college students" OR DE "ANXIETY" OR ((common-mental-disorder OR common-mental-disorders OR depression OR depressive-disorder OR depressive-disorders OR mood-disorder OR mood-disorders OR anxiety OR generalized-anxiety-disorder OR acute-stress-disorder OR acute-stress-disorders OR traumatic-stress-disorder OR traumatic-stress-disorders OR post-traumatic-stress-disorder OR posttraumatic-stress-disorder OR post-traumatic-stress-disorders OR posttraumatic-stress-disorders OR PTSD OR posttraumatic-neuroses OR post-traumatic-neuroses OR post-traumatic-neuroses) AND (diagnosis OR diagnose* OR disorder OR disorders OR psychiatr* OR psychotherap* OR psychologist* OR cognitive-behavioral-therapy OR cognitive-behavioural-therapy OR clinical OR clinically OR baseline OR pre-existing)) | 34,366      |
| 4      | 1 AND 2 AND 3                                                                                                                                                                                                                                                                                                                                                                                                                                                                                                                                                                                                                                                                                                                                                                                                                                                                                                               | 424         |

SportDiscus before duplicate removal: 424

SportDiscus after duplicate removal: 285

**Web of Science Search – Run 9/14/2023**

| Search | Query                                                                                                                                                                                                                                                                                                                                                                                                                                                                                                                                                                                                                                                                                                                                                                          | Items Found |
|--------|--------------------------------------------------------------------------------------------------------------------------------------------------------------------------------------------------------------------------------------------------------------------------------------------------------------------------------------------------------------------------------------------------------------------------------------------------------------------------------------------------------------------------------------------------------------------------------------------------------------------------------------------------------------------------------------------------------------------------------------------------------------------------------|-------------|
| 1      | TS=((female OR females OR women OR woman OR woman-identified OR women-identified OR women-identifying OR woman-identifying OR female-identifying OR female-identified OR “woman identified” OR “women identified” OR “women identifying” OR “woman identifying” OR “female identifying” OR “female identified”))                                                                                                                                                                                                                                                                                                                                                                                                                                                               | 2,882,234   |
| 2      | TS=(((student OR college OR collegiate OR intercollegiate OR intramural OR club OR university OR varsity) AND (athlete OR athletes OR athletics OR sport OR sports)) OR NCAA OR "Athletic Coast Conference" OR "Big 10" OR "Southeastern Conference" OR "Pac 12" OR "Big 12" OR nail OR "National Collegiate Athletic Association" OR "National Association of Intercollegiate Athletics")                                                                                                                                                                                                                                                                                                                                                                                     | 84,595      |
| 3      | TS=(((common-mental-disorder OR common-mental-disorders OR depression OR depressive-disorder OR depressive-disorders OR mood-disorder OR mood-disorders OR anxiety OR generalized-anxiety-disorder OR acute-stress-disorder OR acute-stress-disorders OR traumatic-stress-disorder OR traumatic-stress-disorders OR post-traumatic-stress-disorder OR posttraumatic-stress-disorder OR post-traumatic-stress-disorders OR posttraumatic-stress-disorders OR PTSD OR posttraumatic-neuroses OR post-traumatic-neuroses OR post-traumatic-neuroses) AND (diagnosis OR diagnose* OR disorder OR disorders OR psychiatr* OR psychotherap* OR psycholog* OR cognitive-behavioral-therapy OR cognitive-behavioural-therapy OR clinical OR clinically OR baseline OR pre-existing)) ) | 554,542     |
| 4      | #1 AND #2 AND #3                                                                                                                                                                                                                                                                                                                                                                                                                                                                                                                                                                                                                                                                                                                                                               | 426         |

Web of Science before duplicate removal: 426

Web of Science after duplicate removal: 232

Google Scholar (first 100 results) – keywords: anxiety, depression, stress, student, athletes, women/female

- All articles of interest were in the identified articles already selected for screening.

## Methods Section

### Search Methods

A systematic search strategy was established between the lead researcher [author LB] and a team of experienced academic librarians specializing in health science systematic reviews and meta-analyses. The search strategies were created using a combination of subject headings and keywords and were used to search PubMed via the National Library of Medicine (NLM), CINAHL via EBSCO, and APA PsycInfo via EBSCO, SportDiscus via EBSCO, and Web of Science via Clarivate on June 29, 2022. The search was re-run on September 14, 2023, for all five databases. Databases were searched from 1972 [enactment of Title IX] through September 14, 2023, to identify eligible citations. Hand searching of citations (i.e., bibliography search) from included studies from the database searches was completed from study inception through September 20, 2023.

### Search Results

The searches for original research studies in PubMed, CINAHL, PsycInfo, SportDiscus, and Web of Science on June 29<sup>th</sup>, 2022, yielded a total of 2,609 citations. Citations were imported to Covidence, an online software program for managing systematic reviews. Duplicates were removed through Covidence automation leaving a total of 2,099 unique citations. The first five pages (100 citations) on Google Scholar were searched using keywords [anxiety, depression, stress, student, athletes, women/female] and 32 citations were identified. The Google Scholar citations were cross-referenced with the database citations, all Google Scholar citations identified for possible inclusion were duplicates with citations already included for review; thus, the records were removed before screening. The search re-run of all five databases on September 14, 2023, generated 298 new citations, which led to a total of 2,397 unique citations. The first five pages (100 citations) on Google Scholar were re-searched using keywords [anxiety, depression, stress, student, athletes, women/female] on September 16, 2023, and no unique citations were identified. Searches were re-run on December 23<sup>rd</sup>, 2023, to identify any studies prior to 1973, 2 studies were identified from SportDiscus and included for screening. Forty-five studies were selected via this process for the systematic review. The citation list of the selected articles was hand searched from study inception through September 20<sup>th</sup>, 2023, which yielded 72 articles for review. Ultimately, seven additional studies were included for analysis totalling 52 selected studies for the systematic review.

All authors from the original database search were contacted by the lead author LB for data for the meta-analysis in early March 2023 and provided six weeks for return of data by mid-April 2023. Authors were emailed twice requesting correlations coefficients specific to their study determinant(s) and depression, anxiety, and/or stress as well as offered to share their de-identified data for our team to analyze. Authors from the hand searches were contacted by LB for data for the meta-analysis within one week of the articles being identified and given until June 7<sup>th</sup>, 2023, to provide data. Authors from the re-run database search were contacted by the lead author LB for data for the meta-analysis and asked to provide data if feasible by September 28<sup>th</sup>, 2023. Given the brevity in turnaround time, only one author from the five papers added in the updated search was able to provide data which was then included in the meta-analysis. Additionally, one paper also included the necessary correlation coefficients thus was also included in the meta-analysis.

In summary, 12 of the 50 contacted authors (24%) shared their data and/or correlation coefficients; however, one study was not able to be included in the meta-analysis because the determinant was unquantifiable. Two additional studies were included in the meta-analysis because the papers published the necessary data for a meta-analysis. Accordingly, 13 articles were included in the meta-analysis.

**Supplementary Table 2.** Summary of included studies.

| Study                   | Title                                                                                                         | Year | Study Design              | Purpose                                                                                                                                                                                                                                                                                                                                          | NCAA Division (I, II, III) | Mean Age (SD) years | Freshman (%) | N (female only) | Female (%) | White (%) | Sports (#) |
|-------------------------|---------------------------------------------------------------------------------------------------------------|------|---------------------------|--------------------------------------------------------------------------------------------------------------------------------------------------------------------------------------------------------------------------------------------------------------------------------------------------------------------------------------------------|----------------------------|---------------------|--------------|-----------------|------------|-----------|------------|
| Anderson et al.         | Self-reported mental health measures among incoming collegiate student-athletes who had SARS-COVID-19         | 2023 | Longitudinal/Cohort Study | Compare patient-reported mental health outcomes for incoming collegiate athletes who did (COVID+) and did not (COVID-) have COVID-19.                                                                                                                                                                                                            | DI                         | 18.9 (0.16)         | -            | 94              | 41.6       | 81.6      | 15         |
| Appaneal et al.         | Measuring postinjury depression among male and female competitive athletes                                    | 2009 | Quasi-experimental        | Examine athletes' postinjury depression symptoms using two different measurement strategies while addressing some of the design and sample limitations in previous literature                                                                                                                                                                    | DI-DII                     | 19.7 (2)            | -            | 56              | 34.1       | 72        | 8          |
| Armstrong & Oomen-Early | Social connectedness, self-esteem, and depression symptomatology among collegiate athletes versus nonathletes | 2009 | Cross-sectional           | Compare collegiate athletes and nonathletes to see whether there were significant differences in the perceived levels of social connectedness, self-esteem, and depression and if an interaction among the variables of athlete status, gender, GPA, BMI, and levels of weekly exercise and sleep were associated with depression symptomatology | DI                         | 19.8 (1.3)          | 29.1         | 136             | 59.9       | 75.8      | -          |
| Benjamin et al.         | Sleep dysfunction and mood in collegiate soccer athletes                                                      | 2020 | Prospective Cohort Study  | Examine how psychological measures, player status, and sex-related factors were associated with perceived sleep quality                                                                                                                                                                                                                          | DI                         | 20 (1)              | -            | 120             | 52.2       | -         | 6          |

|                 |                                                                                                                           |      |                 |                                                                                                                                                                                                                                                                                     |         |             |      |     |      |      |    |
|-----------------|---------------------------------------------------------------------------------------------------------------------------|------|-----------------|-------------------------------------------------------------------------------------------------------------------------------------------------------------------------------------------------------------------------------------------------------------------------------------|---------|-------------|------|-----|------|------|----|
| Bravata et al.  | Correlations among symptoms of depression and problematic eating patterns in intercollegiate athletes                     | 2002 | Cross-sectional | Examine the relationship between eating disorders and depressive symptomatology in a convenience sample of intercollegiate athletes                                                                                                                                                 | DI      | 20<br>(1.6) | 23   | 39  | 68.4 | 74   | -  |
| Brenner et al.  | Factors associated with anxiety among Division III student-athletes during the COVID-19 pandemic: A cross-sectional study | 2023 | Cross-sectional | Analyze if female Division III collegiate student-athletes reported higher levels of anxiety compared to male Division III collegiate student-athletes and to determine if individual sport student-athletes will report higher levels of anxiety than team sport student-athletes. | DIII    | -           | -    | 348 | 59.9 | 82.5 | -  |
| Brown et al.    | NCAA student-athlete mental health and wellness: A biopsychosocial examination                                            | 2021 | Cross-sectional | Use the biopsychosocial model to explore biological and psychosocial grouping factors (i.e., sex, race, NCAA division) that may influence student-athlete mental health (e.g., anxiety, depression, stress) and overall wellness (i.e., overall health and quality of life)         | DI-DIII | 20.3        | 24.4 | 185 | 38.9 | 71.9 | 9  |
| Bullard, J.B.   | The impact of COVID-19 on the well-being of Division III student-athletes                                                 | 2020 | Cross-sectional | Examine the mental distress and programming needs of Division III student-athletes in response to COVID-19                                                                                                                                                                          | DIII    | -           | 28.7 | 374 | 53   | 76   | 21 |
| Chandler et al. | The impacts of COVID-19 on collegiate student-athlete training, health, and well-being                                    | 2021 | Cross-sectional | Determine the impact of COVID-19 and stay-at-home (SAH) orders on collegiate student-athletes' training, nutrition, sleep habits, and mental health and to identify disparities between sexes and competitive divisions                                                             | DI-DIII | 20 (2)      | 7.6  | 260 | 64.8 | 87   | 14 |



|                    |                                                                                                                                  |      |                 |                                                                                                                                                                                                                                                        |    |               |      |     |      |       |    |
|--------------------|----------------------------------------------------------------------------------------------------------------------------------|------|-----------------|--------------------------------------------------------------------------------------------------------------------------------------------------------------------------------------------------------------------------------------------------------|----|---------------|------|-----|------|-------|----|
| Christensen et al. | Diet quality and mental health status among Division I female collegiate athletes during the covid-19 pandemic                   | 2021 | Cross-sectional | Examine the association between diet quality and mental health among Division I Female Collegiate Athletes during the COVID-19 Pandemic                                                                                                                | DI | 19.3<br>(1.5) | 32.9 | 77  | 100  | 68.35 | 6  |
| Covassin et al.    | Postinjury anxiety and social support among collegiate athletes: A comparison between orthopaedic injuries and concussions       | 2014 | Cross-sectional | Compare the anxiety and social support of athletes with concussions and a matched group of athletes with orthopaedic injuries                                                                                                                          | DI | 22.7<br>(1.7) | 22.2 | 34  | 27   | -     | 9  |
| Covassin et al.    | Exploring the relationship between depression and seasonal affective disorder in incoming first year collegiate student-athletes | 2019 | Cross-sectional | Examine the prevalence, sex differences, and relationship between symptoms of depression and seasonal affective disorder (SAD) in collegiate student-athletes                                                                                          | DI | -             | 100  | 171 | 57.8 | -     | 16 |
| Cox et al.         | Investigating the prevalence and risk factors of depression symptoms among NCAA Division I collegiate athletes                   | 2017 | Cross-sectional | Determine an overall prevalence rate for depression symptoms among National Collegiate Athletic Association (NCAA) Division I collegiate athletes while also assessing various risk factors that may increase an athlete's vulnerability to depression | DI | -             | 30.5 | 622 | 65.5 | 83.9  | -  |
| de Souza et al.    | Patterns of health behaviors affecting mental health in collegiate athletes                                                      | 2019 | Cross-sectional | Examine the association of multiple health behaviors to mental health functioning in male and female collegiate athletes                                                                                                                               | DI | 18.5<br>(1)   | 100  | 83  | 45.4 | -     | 16 |

|                       |                                                                                                                                                                                            |      |                                |                                                                                                                                                                                                                             |           |            |      |     |      |      |    |
|-----------------------|--------------------------------------------------------------------------------------------------------------------------------------------------------------------------------------------|------|--------------------------------|-----------------------------------------------------------------------------------------------------------------------------------------------------------------------------------------------------------------------------|-----------|------------|------|-----|------|------|----|
| Evers et al.          | The adaptation and evaluation of a pilot mindfulness intervention promoting mental health in student athletes                                                                              | 2021 | Pilot Study/Quasi-experimental | Examine the effectiveness of a pilot mindfulness program for student athletes by assessing mental health, mindfulness ability, and perceived stress before and after the intervention                                       | DIII      | 20 (1)     | 6.89 | 22  | 75.9 | 93.1 | 14 |
| Fogaca, J. L.         | Combining mental health and performance interventions: Coping and social support for student-athletes                                                                                      | 2018 | Quasi-experimental             | Teach college student-athletes coping skills to improve both performance and mental health and increase their social support from coaches and captains                                                                      | DI        | 19.8 (1.1) | 38.6 | 45  | 51   | 83   | -  |
| Garver et al.         | Change-event steals "athlete" from "college athlete": Perceived impact and depression, anxiety, and stress                                                                                 | 2021 | Cross-sectional                | Assess the perceived impact and impact on mental health (e.g., depression, anxiety, and stress) of the change-event of COVID- 19 on college athletes and members of other campus groups                                     | DII       | 20 (1.6)   | -    | 124 | 49.8 | -    | 12 |
| Graupensperger et al. | Social (un)distancing: teammate interactions, athletic identity, and mental health of student-athletes during the COVID-19 pandemic                                                        | 2020 | Prospective Cohort Study       | Examined how student-athletes' mental health was associated with teammate social support, connectedness, and changes to athletic identity from before to during COVID-19                                                    | DII; DIII | 19.8 (1.4) | -    | 135 | 62.9 | -    | -  |
| Gross et al.          | An empirical examination comparing the Mindfulness-Acceptance-Commitment approach and psychological skills training for the mental health and sport performance of female student athletes | 2003 | Randomized Control Trial       | Investigate the effectiveness of the Mindfulness-Acceptance-Commitment (MAC) approach compared to traditional Psychological Skills Training (PST) for the mental health and sport performance of female collegiate athletes | DIII      | -          | 45.5 | 18  | 100  | 18.2 | -  |

|                 |                                                                                                                                                     |      |                             |                                                                                                                                                                                                                                                                          |          |            |      |                     |                 |                   |    |
|-----------------|-----------------------------------------------------------------------------------------------------------------------------------------------------|------|-----------------------------|--------------------------------------------------------------------------------------------------------------------------------------------------------------------------------------------------------------------------------------------------------------------------|----------|------------|------|---------------------|-----------------|-------------------|----|
| Guo et al.      | Differences in postinjury psychological symptoms between collegiate athletes with concussions and orthopedic injuries                               | 2018 | Prospective Cohort Study    | Describe the differences in postinjury psychological symptoms among Division I collegiate student athletes sustained concussions versus orthopedic injuries and to examine the effects of injury type on postinjury psychological symptoms during the course of recovery | DI       | -          | 20.6 | 197 (# of injuries) | 33% of injuries | 74.5% of injuries | 9  |
| Hagiwara et al. | Relationships among sports helplessness, depression, and social support in American college student-athletes                                        | 2017 | Cross-sectional             | Examine the relationships between social support and mental health problems among male and female intercollegiate student-athletes                                                                                                                                       | DI; DIII | 20.2 (1.2) | -    | 99                  | 48.5            | -                 | 15 |
| Kontos et al.   | Depression and neurocognitive performance after concussion among male and female high school and collegiate athletes                                | 2012 | Longitudinal/Cohort Study   | Examine the relationship of sport-related concussion with depression and neurocognitive performance and symptoms among male and female high school and college athletes                                                                                                  | DI       | -          | -    | 24                  | 32              | -                 | -  |
| Lamb et al.     | Elevated salivary IgA, decreased anxiety, and an altered oral microbiota are associated with active participation on an undergraduate athletic team | 2017 | Pilot Study/Cross-sectional | Compare measures of fitness, anxiety, salivary IgA, salivary cortisol, and culturable oral bacteria among female NCAA Division III athletes “in-season” (ice hockey) or “off-season” (soccer)                                                                            | DIII     | -          | -    | 19                  | 100             | -                 | 2  |
| Leone et al.    | Celiac disease symptoms in athletes: Prevalence indicators of perceived quality of life                                                             | 2020 | Cross-sectional             | Understand Celiac disease (CD) prevalence and comorbidities are unknown in collegiate athletics                                                                                                                                                                          | DI-DIII  | 20.6 (1.7) | -    | 57                  | 40.4            | 70                | -  |

|                    |                                                                                                                                            |      |                          |                                                                                                                                                                                                                           |         |               |   |       |      |      |    |
|--------------------|--------------------------------------------------------------------------------------------------------------------------------------------|------|--------------------------|---------------------------------------------------------------------------------------------------------------------------------------------------------------------------------------------------------------------------|---------|---------------|---|-------|------|------|----|
| Mikesell et al.    | The relationship of resilience, self-compassion, and social support to psychological distress in women collegiate athletes during COVID-19 | 2023 | Cross-sectional          | Examine the direct and indirect relationships of resilience, self-compassion, and social support to women collegiate athletes' psychological distress.                                                                    | DI-DIII | 20.0<br>(1.3) | - | 3,924 | 100  | 81.2 | 24 |
| Miller et al.      | Alcohol misuse among college athletes: self-medication for psychiatric symptoms?                                                           | 2002 | Prospective Cohort Study | Examine alcohol abuse as well as self-reported depression, anxiety, and other psychiatric symptoms among college athletes                                                                                                 | DI      | -             | - | 97    | 37   | 80   | -  |
| O'Connor et al.    | Mood state and salivary cortisol levels following overtraining in female swimmers                                                          | 1989 | Cohort study             | Monitor selected mood states and salivary cortisol during overtraining in a group of female college swimmers                                                                                                              | DI      | -             | - | 22    | 100  | -    | 1  |
| Pierce, E. F., Jr. | Relationship between training volume and mood states in competitive swimmers during a 24-week season                                       | 2002 | Prospective Cohort Study | Examine the relationship between training volume and specific mood states among collegiate swimmers over the course of a competitive season                                                                               | DI      | 19.8<br>(2.1) |   | 17    | 58.6 | -    | 1  |
| Powers et al.      | Predicting student-athlete mental health: Coach-Athlete relationship                                                                       | 2020 | Cross-sectional          | Investigate if coach-athlete relationships could predict college student athletes' mental health outcomes (i.e., well-being, depression, and anxiety) beyond the known effects of gender and personality on mental health | DI      | 19.5<br>(1.3) | - | 56    | 70.9 | 97.5 | 16 |
| Raglin et al.      | State anxiety and blood pressure following 30 min of leg ergometry or weight training                                                      | 1993 | Prospective Cohort Study | Examine the effect of different modes of acute exercise (30 minutes of weight training or leg ergometry) on state anxiety and blood pressure                                                                              | DI      | 20.4<br>(1.1) | - | 11    | 42.3 | -    | -  |

|                |                                                                                                                                                              |      |                                 |                                                                                                                                                                        |         |               |    |       |      |      |   |
|----------------|--------------------------------------------------------------------------------------------------------------------------------------------------------------|------|---------------------------------|------------------------------------------------------------------------------------------------------------------------------------------------------------------------|---------|---------------|----|-------|------|------|---|
| Roby et al.    | Psychological distress differs between female and male college athletes during baseline concussion assessment                                                | 2021 | Cross-sectional                 | Examine how preseason psychological distress measures (i.e., depression, anxiety, and somatization) in college athletes are affected by sex and concussion history     | DI      | 20.6<br>(1.4) | -  | 152   | 36.7 | -    | - |
| Roiger et al.  | A longitudinal pilot study of depressive symptoms in concussed and injured/nonconcussed National Collegiate Athletic Association Division I student-athletes | 2015 | Descriptive Epidemiologic Study | Examine the extent to which National Collegiate Athletic Association Division I student-athletes demonstrated postinjury depressive symptoms                           | DI      | 19.8<br>(1.4) | -  | -     | -    | -    | 6 |
| Sanborn et al. | Prevalence of COVID-19 anxiety in Division I student-athletes                                                                                                | 2021 | Cross-sectional                 | Examine the prevalence of COVID-19 anxiety in 437 National Collegiate Athletic Association Division I student-athletes and its association with psychological symptoms | DI      | 19.7<br>(1.3) | -  | 224   | 51.3 | -    | - |
| Slavin et al.  | Collegiate student-athlete psychological distress and counseling utilization during COVID-19                                                                 | 2023 | Cross-sectional                 | Determine how gender and race related to rates of depression, stress, and counseling use at the beginning of the pandemic (April/May 2020).                            | DI-DIII | 20.1<br>(1.4) | -  | 3,838 | 66.7 | 72.2 | - |
| Storch et al.  | Self-reported psychopathology in athletes: A comparison of intercollegiate student-athletes and non-athletes                                                 | 2005 | Cross-sectional                 | Investigate rates of psychosocial maladjustment in a sample of intercollegiate athletes and non-athletes                                                               | DI      | 20.9<br>(3)   | -  | 51    | 48.6 | 69.8 | 7 |
| Storch et al.  | Strength of religious faith and psychological adjustment in intercollegiate athletes                                                                         | 2004 | Cross-sectional                 | Investigate associations among religious faith and depressive symptoms, trait anxiety, and loneliness                                                                  | DI      | 20<br>(1.6)   | 21 | 39    | 63.9 | 75   | - |

|                  |                                                                                                                            |      |                                 |                                                                                                                                                              |         |            |                               |                              |                 |                   |    |
|------------------|----------------------------------------------------------------------------------------------------------------------------|------|---------------------------------|--------------------------------------------------------------------------------------------------------------------------------------------------------------|---------|------------|-------------------------------|------------------------------|-----------------|-------------------|----|
| Storch et al.    | Religiosity and depression in intercollegiate athletes                                                                     | 2002 | Cross-sectional                 | Investigate the relationship between organizational, non-organizational, and intrinsic religiosity, and depression in intercollegiate athletes               | DI      | 19 (.75)   |                               | 51                           | 48.6            | 61.9              | 7  |
| Sullivan et al.  | Social support and post-injury depressive and anxiety symptoms among college-student athletes                              | 2022 | Cross-sectional                 | Examine the effects of changes in social support on post-injury depressive and anxiety symptoms among college-student athletes                               | DI      | -          | 47.1                          | 197 injuries....not reported | 33% of injuries | 74.5% of injuries | 9  |
| Sullivan et al.  | Relationship between social support and depressive symptoms in collegiate student athletes                                 | 2020 | Prospective Cohort Study        | Examine depressive symptoms in collegiate athletes and how they relate to different types and sources of social support                                      | DI      | 19.7 (1.3) | 60.5% (freshman & sophomores) | 112                          | 47.1            | 76.9              | 15 |
| Tobar, David A.  | Trait anxiety and mood state responses to overtraining in men and women college swimmers                                   | 2012 | Prospective Cohort Study        | Examine the role of trait anxiety and gender on mood state responses of college swimmers during overtraining and taper                                       | DI      | -          | -                             | 46                           | 39.7            | -                 | 1  |
| Tomlinson et al. | Depression in collegiate runners and soccer players: Relationships with serum 25-hydroxyvitamin d, ferritin, and fractures | 2021 | Prospective Observational Study | Evaluate relationships between depression versus serum 25-hydroxyvitamin D (vitamin D), serum ferritin (ferritin), and fractures across a competitive season | DI      | 19.8 (1.4) | -                             | 29                           | 56.8            | -                 | 2  |
| Tran, AGTT       | In or out of the game? Counter-stereotype paradoxes and Asian-identified student-athlete mental health                     | 2021 | Cohort study                    | Examine stressors (i.e., discrimination and stereotypes) and buffers (i.e., exercise) relevant to Asian-identified student-athletes' mental health.          | DI-DIII | -          | -                             | 345                          | 53.8            | 0                 | -  |

|                |                                                                                                                        |      |                                          |                                                                                                                                                                                                                                                                                                                                |         |            |      |     |      |      |    |
|----------------|------------------------------------------------------------------------------------------------------------------------|------|------------------------------------------|--------------------------------------------------------------------------------------------------------------------------------------------------------------------------------------------------------------------------------------------------------------------------------------------------------------------------------|---------|------------|------|-----|------|------|----|
| Turner et al.  | Comparison of psychological response between concussion and musculoskeletal injury in collegiate athletes              | 2017 | Prospective Cohort Study                 | Compare the psychological responses of student-athletes who have been diagnosed with a concussion to those of athletes diagnosed with musculoskeletal injuries with similar recovery duration                                                                                                                                  | DI      | -          | 33.3 | 13  | 43.3 | -    | -  |
| Valster et al. | Mental health prevalence in NCAA Division III collegiate athletes                                                      | 2022 | Nonexperimental Trend Study/Cohort Study | Identify the level of clinically relevant self-reported mental health symptoms in National Collegiate Athletic Association (NCAA) Division III athletes and variations based on sport participation (i.e., men's or women's athletics; team or individual sports) over a two-year period                                       | DIII    | -          | 37.9 | 373 | 34.9 | -    | -  |
| Vargas et al.  | Predictors and prevalence of postconcussion depression symptoms in collegiate athletes                                 | 2015 | Case-control                             | Describe the prevalence of depressive symptoms in a collegiate athlete sample at baseline and postconcussion, compare these levels of symptoms and change in symptoms with those of a control group with no reported concussions in the past year, and examine the baseline predictors for post-concussion depression symptoms | DI      | 18.4 (.8)  | -    | 40  | 31.7 | 68.3 | 6  |
| Weber et al.   | Health-related quality of life following concussion in collegiate student-athletes with and without concussion history | 2018 | Prospective Cohort Study                 | Compare global and specific health-related quality of life (HRQOL) throughout concussion recovery between those with and without concussion history                                                                                                                                                                            | DI-DIII | 19.4 (1.4) | -    | 112 | 45.9 | 80   | 19 |

|                    |                                                                                                                  |      |                          |                                                                                                                                                                                                    |         |            |      |     |      |      |    |
|--------------------|------------------------------------------------------------------------------------------------------------------|------|--------------------------|----------------------------------------------------------------------------------------------------------------------------------------------------------------------------------------------------|---------|------------|------|-----|------|------|----|
| Weber et al.       | An examination of depression, anxiety, and self-esteem in collegiate student-athletes                            | 2023 | Cross-sectional          | Examine the prevalence of depression, anxiety, and self-esteem in collegiate student-athletes and differences between sex, academic status, and sport type to identify associations for risks.     | DI; DII | 19.5 (0.1) | 17.1 | 382 | 62.1 | 51.7 | -  |
| Wilson & Pritchard | Comparing sources of stress in college student athletes and non-athletes                                         | 2005 | Cross-sectional          | Compare sources of stress in first semester college freshman student athletes versus student non-athletes                                                                                          | DI      | 18.5 (1.2) | 100  | 235 | 64.9 | -    | -  |
| Wilson et al.      | Associations among omega-3 fatty acid status, anxiety, and mental toughness in female collegiate athletes        | 2017 | Cross-sectional          | Describe omega-3 fatty acid levels in athletes and their associations with anxiety and mental toughness                                                                                            | DI      | 19.5 (1.3) | -    | 54  | 100  | -    | 4  |
| Wolanin et al.     | Prevalence of clinically elevated depressive symptoms in college athletes and differences by gender and sport    | 2016 | Prospective Cohort Study | Describe the prevalence of depression symptoms among NCAA division I student athletes at a single institution over 3 consecutive years                                                             | DI      | -          | 34.2 | 263 | 56.9 | 88.8 | 12 |
| Yang et al.        | Prevalence of and risk factors associated with symptoms of depression in competitive collegiate student athletes | 2007 | Cohort study             | Describe the prevalence of symptoms of depression among competitive collegiate student athletes and examine the factors associated with symptoms of depression among this population               | DI      | 20 (1.3)   | 23.7 | 90  | 35   | 89.9 | 13 |
| Yang et al.        | Social support from the athletic trainer and symptoms of depression and anxiety at return to play                | 2014 | Prospective Cohort Study | Examine the effect of social support received from athletic trainers during injury recovery on reported symptoms of depression and anxiety at return to play among a cohort of collegiate athletes | DI      | -          | 20.7 | 131 | 33.8 | 74.9 | 9  |



**Supplementary Table 3.** Summary of findings.

| Study                   | Measures                                                                                                                                  | Determinant(s)                                           | Determinant Themes                           | Depression, Anxiety, and/or Stress | Main Depression, Anxiety, and Stress Findings                                                                                                                                                                                                                                                                                                                                                                                                                                                                                                                                                                                                                                                                                                                                                                                                                                                                                                                                             |
|-------------------------|-------------------------------------------------------------------------------------------------------------------------------------------|----------------------------------------------------------|----------------------------------------------|------------------------------------|-------------------------------------------------------------------------------------------------------------------------------------------------------------------------------------------------------------------------------------------------------------------------------------------------------------------------------------------------------------------------------------------------------------------------------------------------------------------------------------------------------------------------------------------------------------------------------------------------------------------------------------------------------------------------------------------------------------------------------------------------------------------------------------------------------------------------------------------------------------------------------------------------------------------------------------------------------------------------------------------|
| Anderson et al.         | Hospital Anxiety and Depression Scale; State-Trait Anxiety Inventory                                                                      | Biological Sex; COVID-19                                 | Biological Sex; COVID-19                     | Depression and anxiety             | Female student-athletes reported significantly worse anxiety than males regardless of COVID-19 history. Observed differences in HADS and trait anxiety between males and females such that female student-athletes had significantly higher (worse) levels. Post-hoc testing revealed that COVID+ females had significantly worse HADS anxiety ( $p=.011$ ) and STAI trait anxiety ( $p=.002$ ) than all other groups.                                                                                                                                                                                                                                                                                                                                                                                                                                                                                                                                                                    |
| Appaneal et al.         | Center for Epidemiological Studies Depression Scale (CES-D); Hamilton Rating Scale for Depression (interview guide - more qualitative...) | Injury                                                   | Injury                                       | Depression                         | The repeated measures analysis on CES-D scores showed a significant main effect for time, $F(2, 160) = 19.21, p < .001$ , and a significant injury group by time interaction, $F(2, 160) = 5.48, p < .01$ . There was no significant main effect of injury group or main effect for gender. As can be seen in this table, mean CES-D scores declined across time in both groups (main effect of time), but they declined much more steeply for the athletes with injury than for those without injury. Our data provided support for the expected chronological pattern of postinjury depression, wherein both athlete- and clinician-rated depression symptoms decreased over time.                                                                                                                                                                                                                                                                                                      |
| Armstrong & Oomen-Early | Center for Epidemiological Studies Depression Scale (CES-D)                                                                               | Social Connectedness; Biological Sex; Sleep; Self-esteem | Health; Support; Biological Sex; Self-Esteem | Depression                         | Collegiate athletes ( $M = 13.78, SD = 9.09$ ) had lower depression than did nonathletes ( $M = 16.72, SD = 9.81$ ), $F(3, 223) = 4.76, p < .05$ . A stepwise multiple regression determined predictors of depression in college students. Overall, social connectedness, gender, sleep, and self-esteem were significant in predicting depression, $F(3, 223) = 45.25, p < .001$ , and accounted for 45% of the variance. The following results consider when controlling for the other variables: First, an increase in social connectedness predicted a decrease in depression ( $\beta = .539, p < .001$ ). Second, being a female, compared with being a male college student, predicted an increase in depression ( $\beta = .163, p = .001$ ). Third, an increase in days per week of rested sleep predicted a decrease in depression ( $\beta = -.154, p < .01$ ). Last, an increase in self-esteem predicted a decrease in depression ( $\beta = -.124, p < .05$ ; see Table 4). |
| Benjamin et al.         | Profile of Mood States                                                                                                                    | Sleep                                                    | Health; Biological Sex                       | Depression                         | Increased sleep dysfunction was significantly related to increased depression. The odds of reporting global sleep dysfunction were 55% lower for males than females (OR, 0.45; 95% CI, 0.25-0.79; $P = 0.006$ ). Female athletes with poor sleep quality reported significantly higher levels of depression than female athletes with good sleep quality (MD $\pm$ SE depression, $3.37 \pm 0.73$ ). There were no differences in any POMS measures between male and female participants with good sleep quality (MD $\pm$ SE depression, $-0.18 \pm 0.69 [P > 0.99]$ ).                                                                                                                                                                                                                                                                                                                                                                                                                  |
| Bravata et al.          | Beck Depression Inventory-II                                                                                                              | Eating Behaviors                                         | Health; Biological Sex                       | Depression                         | Pearson product-moment correlations indicated problematic eating patterns and depressive symptoms were not meaningfully correlated for the whole sample of intercollegiate athletes ( $r = -.25$ ). However, when stratified by sex, correlations were meaningful and of medium effect size for both women                                                                                                                                                                                                                                                                                                                                                                                                                                                                                                                                                                                                                                                                                |

|                |                                                                                                                   |                                |                                |                                 |                                                                                                                                                                                                                                                                                                                                                                                                                                                                                                                                                                                                                                                                                                                                                                                                                                                                                                                                                                                                                                                                                                                                                                                                                                                                                                                                                                                                                                                                                                                                                       |
|----------------|-------------------------------------------------------------------------------------------------------------------|--------------------------------|--------------------------------|---------------------------------|-------------------------------------------------------------------------------------------------------------------------------------------------------------------------------------------------------------------------------------------------------------------------------------------------------------------------------------------------------------------------------------------------------------------------------------------------------------------------------------------------------------------------------------------------------------------------------------------------------------------------------------------------------------------------------------------------------------------------------------------------------------------------------------------------------------------------------------------------------------------------------------------------------------------------------------------------------------------------------------------------------------------------------------------------------------------------------------------------------------------------------------------------------------------------------------------------------------------------------------------------------------------------------------------------------------------------------------------------------------------------------------------------------------------------------------------------------------------------------------------------------------------------------------------------------|
|                |                                                                                                                   |                                |                                |                                 | ( $r=32$ ) and men ( $r=-39$ ). However, sex appeared to moderate the present values such that problematic eating patterns and depressive symptoms were positively related for women, whereas these variables were negatively related for men.                                                                                                                                                                                                                                                                                                                                                                                                                                                                                                                                                                                                                                                                                                                                                                                                                                                                                                                                                                                                                                                                                                                                                                                                                                                                                                        |
| Brenner et al. | Generalized Anxiety Disorder Scale (GAD-7)                                                                        | Biological Sex; Sport          | Biological Sex; Sport          | Anxiety                         | Female student-athletes had an increase in mild, moderate, and severe cases of anxiety in comparison to male student-athletes. Female student-athletes reported almost three times more likely than males to report some level of anxiety (OR=2.942, CI 95% 1.958-4.421, $p=.000$ ). Significant differences were reported among female participants rostered on an individual sport team in comparison to female participants rostered on a team with teammates ( $p=.000$ ). Female student-athletes rostered in an individual sport were three times more likely (PR=3.2, 95% CI, 1.66-6.16) than female athletes rostered in a team sport to report experiencing mild to severe anxiety. Female student-athletes who participated in team sports were almost two-and-half times more likely than men to report mild to severe anxiety (PR=2.45, CI 1.48-4.07). The odd's ratio among female and male rostered on a team with teammates within GAD-7 Scale responses reported that female team sport athletes had 2.449 times more chance ( $p=.000$ ) of reporting anxiety than male individual sport athletes.                                                                                                                                                                                                                                                                                                                                                                                                                                   |
| Brown et al.   | Patient Health Questionnaire (PHQ-9); Generalized Anxiety Disorder Scale (GAD-7); Perceived Stress Scale (PSS-10) | Biological Sex; Division; Race | Biological Sex; Division; Race | Depression, anxiety, and stress | Female student-athletes reported a greater number of mental health diagnoses ( $M = 0.50$ , $SD = 0.93$ ) than male student-athletes ( $M = 0.32$ , $SD = 0.69$ ), $t(471) = -2.46$ , $p = 0.014$ , $d = 0.23$ ). Similarly, compared to their male counterparts, female student-athletes endorsed greater symptoms of anxiety ( $p < 0.001$ , $d = 0.40$ ), depression ( $p < 0.001$ , $d = 0.34$ ), and stress ( $p = 0.003$ , $d = 0.30$ ). Results from an independent samples t-test (White vs. student-athletes of Color) indicated that student-athletes of Color endorsed higher stress ( $p = 0.007$ , $d = 0.31$ ) than White student-athletes. However, there were no differences in mental health diagnoses ( $p = 0.689$ ), anxiety ( $p = 0.253$ ), or depression ( $p = 0.331$ ) between the two racial groups. The effect of NCAA division was significant for anxiety, $F(2, 441) = 4.32$ , $p = 0.014$ , and depression, $F(2, 428) = 3.72$ , $p = 0.025$ . Post hoc comparisons using the Games-Howell test (due to unequal groups) revealed that anxiety ( $M = 6.15$ , $SD = 5.30$ , $p = 0.006$ ) and depression ( $M = 5.34$ , $SD = 5.12$ , $p = 0.008$ ) scores of DI athletes were significantly greater than anxiety ( $M = 4.36$ , $SD = 4.33$ ) and depression ( $M = 3.65$ , $SD = 4.17$ ) scores of DIII student-athletes. However, anxiety ( $M = 4.98$ , $SD = 4.58$ ) and depression ( $M = 4.97$ , $SD = 4.18$ ) scores reported by DII student-athletes did not significantly differ from DI or III participants. |
| Bullard, J.B.  | Generalized Anxiety Disorder Scale (GAD-7)                                                                        | COVID-19                       | COVID-19                       | Anxiety                         | Significant findings revealed that female participants were more likely than male participants to express worry for the future during the COVID-19 pandemic. Mental distress was associated with lack of resources and the absence of available facilities to train for their sport. This setback led student-athletes to experience increased feelings of stress.                                                                                                                                                                                                                                                                                                                                                                                                                                                                                                                                                                                                                                                                                                                                                                                                                                                                                                                                                                                                                                                                                                                                                                                    |

|                    |                                                             |                                               |                                               |                                 |                                                                                                                                                                                                                                                                                                                                                                                                                                                                                                                                                                                                                                                                                                                                                                                                                                                                                                                                                                                                                                                                                                                                                                                                                                                                                                                                                                                                                                                                                                                                                                                                                                                                                                                                                                                                                                                                                                              |
|--------------------|-------------------------------------------------------------|-----------------------------------------------|-----------------------------------------------|---------------------------------|--------------------------------------------------------------------------------------------------------------------------------------------------------------------------------------------------------------------------------------------------------------------------------------------------------------------------------------------------------------------------------------------------------------------------------------------------------------------------------------------------------------------------------------------------------------------------------------------------------------------------------------------------------------------------------------------------------------------------------------------------------------------------------------------------------------------------------------------------------------------------------------------------------------------------------------------------------------------------------------------------------------------------------------------------------------------------------------------------------------------------------------------------------------------------------------------------------------------------------------------------------------------------------------------------------------------------------------------------------------------------------------------------------------------------------------------------------------------------------------------------------------------------------------------------------------------------------------------------------------------------------------------------------------------------------------------------------------------------------------------------------------------------------------------------------------------------------------------------------------------------------------------------------------|
| Chandler et al.    | State-Trait Anxiety Inventory (adapted questions)           | Stay At Home                                  | Training Volume; Division                     | Depression, anxiety, and stress | When asked about the psychological impact of continuing to train during stay at home (SAH), 43.9% (n = 109) of females indicated their training increased their stress levels in contrast to 26.2% (n = 26) of males. In terms of division, significantly more D3 respondents reported increased feelings of stress, tension during SAH.                                                                                                                                                                                                                                                                                                                                                                                                                                                                                                                                                                                                                                                                                                                                                                                                                                                                                                                                                                                                                                                                                                                                                                                                                                                                                                                                                                                                                                                                                                                                                                     |
| Christensen et al. | Depression, Anxiety, Stress Scale (DASS-21)                 | Diet Quality                                  | Health                                        | Stress                          | For the DASS-21, a significant difference in Health Eating Index (HEI) was found between participants who reported low and high stress (low stress = 56.1, high stress = 62.6, $p = 0.015$ ). Participants with worse mental health consistently had higher HEI scores than their counterparts. In sum, HEI scores were significantly positively associated with stress ( $p = 0.015$ )                                                                                                                                                                                                                                                                                                                                                                                                                                                                                                                                                                                                                                                                                                                                                                                                                                                                                                                                                                                                                                                                                                                                                                                                                                                                                                                                                                                                                                                                                                                      |
| Covassin et al.    | State-Trait Anxiety Inventory                               | Concussions and Orthopedic Injuries           | Injury                                        | Anxiety                         | No differences for the State-Trait Anxiety Inventory ( $t = 1.38, P = .193$ ) between the concussed and orthopedic-injury groups. Social Support Questionnaire scores were significant predictors for postinjury state anxiety. Specifically, increased scores were associated with decreased postinjury state anxiety ( $b = 4.21, P = .0001$ ).                                                                                                                                                                                                                                                                                                                                                                                                                                                                                                                                                                                                                                                                                                                                                                                                                                                                                                                                                                                                                                                                                                                                                                                                                                                                                                                                                                                                                                                                                                                                                            |
| Covassin et al.    | Beck Depression Inventory-II                                | Seasonal Affective Disorder; Academic Year    | Seasonal Affective Disorder; Academic Year    | Depression                      | Our results revealed a positive correlation between symptoms of depression and seasonal affective disorder (SAD). Specifically, freshman student-athletes who had increased SAD also had increased symptoms of depression.                                                                                                                                                                                                                                                                                                                                                                                                                                                                                                                                                                                                                                                                                                                                                                                                                                                                                                                                                                                                                                                                                                                                                                                                                                                                                                                                                                                                                                                                                                                                                                                                                                                                                   |
| Cox et al.         | Center for Epidemiological Studies Depression Scale (CES-D) | Biological Sex; Academic Year; Season; Injury | Biological Sex; Academic Year; Season; Injury | Depression                      | A significant difference was found for sex, $t(947) = -3.30, P = 0.00$ . Female athletes ( $m = 14.46, SD = 10.64$ ) reported significantly higher rates of depression symptoms than male athletes ( $m = 12.10, SD = 10.10$ ). Although originally expected to be a variable of interest for the study, race was not included as an independent variable due to unequal sample sizes. A significant difference was found for academic class, $F(1, 932) = 6.67, P = 0.01, \eta^2 = 0.01, \beta = 0.73$ . Lowerclassmen ( $m = 14.36, SD = 11.08$ ) reported significantly higher rates of depression symptoms than upperclassmen ( $m = 12.74, SD = 9.65$ ). A significant difference was also found for sport season status, $F(1, 932) = 3.98, P = 0.05, \eta^2 = 0.004, \beta = 0.51$ . Athletes in the off-season ( $m = 13.14, SD = 10.39$ ) reported significantly lower rates of depression symptoms compared to in-season athletes ( $m = 14.10, SD = 10.60$ ). Athletes who had suffered an injury in the previous 6 months ( $m = 14.49, SD = 10.99$ ) reported significantly higher rates of depression symptoms than those who had remained healthy during this time ( $m = 13.07, SD = 10.12$ ). A further $t$ test was performed to determine whether, for those who had suffered an injury in the last 6 months, missing practice or competition due to this injury affected depression scale scores. A significant difference was found $t(155) = 4.16, P = 0.00$ , suggesting that those who were forced to miss activity ( $m = 15.30, SD = 11.52$ ) scored significantly higher on the CES-D than those who did not ( $m = 10.85, SD = 7.04$ ). Analysis of the means suggests that athletes who are injured for less than 1 month ( $m = 15.84, SD = 11.96$ ) or for longer than 6 months ( $m = 16.25, SD = 10.65$ ) generally report higher depressive symptoms scores than those who |

|                       |                                                                                               |                                             |                             |                                       |                                                                                                                                                                                                                                                                                                                                                                                                                                                                                                                                                                                                                                                                                                                                                                                                                                                                                                                                                                                                                                                                                                                                                                                                                                                                                                                                        |
|-----------------------|-----------------------------------------------------------------------------------------------|---------------------------------------------|-----------------------------|---------------------------------------|----------------------------------------------------------------------------------------------------------------------------------------------------------------------------------------------------------------------------------------------------------------------------------------------------------------------------------------------------------------------------------------------------------------------------------------------------------------------------------------------------------------------------------------------------------------------------------------------------------------------------------------------------------------------------------------------------------------------------------------------------------------------------------------------------------------------------------------------------------------------------------------------------------------------------------------------------------------------------------------------------------------------------------------------------------------------------------------------------------------------------------------------------------------------------------------------------------------------------------------------------------------------------------------------------------------------------------------|
|                       |                                                                                               |                                             |                             |                                       | are injured for 1-3 months (m = 13.69, SD = 10.99) or 3-6 months (m = 14.92, SD = 11.46).                                                                                                                                                                                                                                                                                                                                                                                                                                                                                                                                                                                                                                                                                                                                                                                                                                                                                                                                                                                                                                                                                                                                                                                                                                              |
| de Souza et al.       | Profile of Mood State;<br>Brief Symptom<br>Inventory-18;<br>Perceived Stress Scale<br>(PSS-4) | Diet; Nutrition;<br>Alcohol;<br>Aggression  | Health                      | Depression,<br>anxiety, and<br>stress | There were no significant differences in mental health outcomes (BSI-18 and PSS total scores) between males and females ( $p > .05$ ). Increased psychological distress and stress symptoms were associated with increased aggressive behaviors and alcohol use, and reduced energy across the whole sample of participants. Higher psychological distress and stress symptoms were associated with greater aggressive behaviors and more frequent alcohol use, and reduced energy for both males and females. Higher psychological distress was associated with more unhealthy dietary habits, reduced attention to nutrition, and less frequent alcohol use in female athletes. The effect was not significant for stress symptoms or in male athletes.                                                                                                                                                                                                                                                                                                                                                                                                                                                                                                                                                                              |
| Evers et al.          | Perceived Stress Scale<br>(PSS-10)                                                            | Mindfulness Pilot                           | Intervention                | Stress                                | When examining perceived stress, the results indicated that the mean overall perceived stress postintervention (M = 16.48, SD = 5.07) was less than the mean overall perceived stress preintervention, albeit not statistically significant (M = 18.66, SD = 4.79), $t(28) = 1.86$ , $p = .073$ ; with $d = 0.35$ , a small effect size is indicated.                                                                                                                                                                                                                                                                                                                                                                                                                                                                                                                                                                                                                                                                                                                                                                                                                                                                                                                                                                                  |
| Fogaca, J. L.         | Beck Anxiety<br>Inventory; Beck<br>Depression Inventory                                       | Mental Skills<br>Training<br>(Intervention) | Intervention                | Depression and<br>anxiety             | Anxiety, $F(1, 79) = 5.017$ , $p = .028$ , significantly improved for the intervention group, compared to the control group. An intervention that teaches student-athletes how to use mental skills both during performance and in other life domains has the potential to improve mental health-related outcomes.                                                                                                                                                                                                                                                                                                                                                                                                                                                                                                                                                                                                                                                                                                                                                                                                                                                                                                                                                                                                                     |
| Garver et al.         | Depression, Anxiety,<br>Stress Scale – 21<br>(DASS-21)                                        | Sport; Biological<br>Sex                    | Sport;<br>Biological<br>Sex | Depression,<br>anxiety, and<br>stress | ANOVA results detected no effect of sport/campus group on depressive symptoms $F(14,221)=1.238$ , $p=0.249$ . The grand mean for all groups (10.1) was within the mild depression range. Females ( $11.5 \pm 9.2$ ; mild depression) had a higher mean depression subscale score ( $p=0.016$ ) than males ( $8.7 \pm 8.7$ ; normal). On the anxiety subscale, Levene's test revealed unequal variances, and Kruskal–Wallis revealed a significant difference between sports $\chi^2(14)=25.362$ , $p=0.031$ . Differences were found between baseball and several sports or groups (cheerleading, volleyball, soccer, softball, and marching band), eSports and several sports or groups (volleyball, soccer, softball, and marching band), basketball and several sports or groups (soccer and marching band), football and marching band, and track and field and marching band. However, all differences were found to be nonsignificant after Bonferroni correction. ANOVA results detected no effect of sport/campus group on stress $F(14,221)=1.550$ , $p=0.095$ . The grand mean for all groups (11.8) was within the normal range. Females ( $13.5 \pm 9.0$ ) had significantly higher stress subscale scores ( $p=0.003$ ) than did than males ( $10.0 \pm 8.9$ ) although, both groups were in the normal range for stress. |
| Graupensperger et al. | Patient-Reported<br>Outcomes<br>Measurement<br>Information System                             | Teammate<br>Support; Identity               | Support;<br>Identity        | Depression                            | Student-athletes who experienced greater support reported less identity dissolution and, in turn, fewer symptoms of depression. Changes in identity were negatively associated with symptoms of depression. Thus, positive associations between teammate social interactions and identity maintenance and subsequently, that identity maintenance was negatively associated with                                                                                                                                                                                                                                                                                                                                                                                                                                                                                                                                                                                                                                                                                                                                                                                                                                                                                                                                                       |

|                 |                                                                                            |                                          |                               |                        |                                                                                                                                                                                                                                                                                                                                                                                                                                                                                                                                                                                                                                                                                                                                                                                                                                                                                                                                                                                                                       |
|-----------------|--------------------------------------------------------------------------------------------|------------------------------------------|-------------------------------|------------------------|-----------------------------------------------------------------------------------------------------------------------------------------------------------------------------------------------------------------------------------------------------------------------------------------------------------------------------------------------------------------------------------------------------------------------------------------------------------------------------------------------------------------------------------------------------------------------------------------------------------------------------------------------------------------------------------------------------------------------------------------------------------------------------------------------------------------------------------------------------------------------------------------------------------------------------------------------------------------------------------------------------------------------|
|                 |                                                                                            |                                          |                               |                        | symptoms of depression. Student-athletes who experienced less identity dissolution following the abrupt cancelation of college sports reported greater indices of mental health and well-being.                                                                                                                                                                                                                                                                                                                                                                                                                                                                                                                                                                                                                                                                                                                                                                                                                       |
| Gross et al.    | Counselling Centre Assessment of Psychological Symptoms-62                                 | Mindfulness-Acceptance-Commitment        | Intervention                  | Depression and anxiety | Results revealed a statistically significant within-group main effect of time on the following subscale scores: Generalized Anxiety ( $F(2, 32) = 5.24, p = .01, h2p = .25$ ), demonstrating that differences existed within one or both of the groups across time. Pairwise comparisons revealed that the MAC participants had statistically significant decreases from post-intervention to one-month follow-up on Generalized Anxiety ( $p = .00$ ). A within-group main effect of time was not found for the subscales: Depression ( $F(2, 32) = 1.04, p = .37, h2p = .06$ ) and Social Anxiety ( $F(2, 32) = 0.70, p = .50, h2p = .04$ ).                                                                                                                                                                                                                                                                                                                                                                        |
| Guo et al.      | Center for Epidemiological Studies Depression Scale (CES-D); State-Trait Anxiety Inventory | Concussions & Orthopedic Injuries        | Injury                        | Depression and anxiety | No significant differences in average depressive symptom scores were observed between the concussion (mean score = 10.77) and orthopedic injury (mean score = 10.81) groups at the baseline ( $P = 0.9729$ ) and at 1-week postinjury follow-up ( $P = 0.1475$ ). However, the average depressive symptom score in the concussion group was significantly higher than the orthopedic injury group at the 1-month postinjury follow-up ( $P = 0.0264$ ). In addition, the 2 groups did not differ in anxiety scores at baseline ( $P = 0.8757$ ) or at each postinjury follow-up ( $P$ 's = .05). A significant interaction between injury type and time loss was found for postinjury depressive symptoms ( $B = 8.49, P = 0.0259$ ). Depressive symptom score increased in the concussion group from 1-week to 1-month postinjury follow-up but decreased in the orthopedic injury group during the same period. Anxiety scores decreased significantly over time for both injury types ( $B = 21.14, P = 0.0001$ ). |
| Hagiwara et al. | Stress Response Scale for Athletes                                                         | Social Support (providing and receiving) | Support                       | Depression             | Correlational analyses indicated, that for female intercollegiate student-athletes there were significant negative correlations between receiving social support and depression ( $r = -0.38$ ) and between providing social support and depression ( $r = -0.29$ ).                                                                                                                                                                                                                                                                                                                                                                                                                                                                                                                                                                                                                                                                                                                                                  |
| Kontos et al.   | Beck Depression Inventory-II                                                               | Concussion; Time; Age; Biological Sex    | Injury (time)                 | Depression             | The results of a 4 (time) x 2 (age) x 2 (sex) repeated-measures ANCOVA (covaried for non-depression concussion symptoms) supported a significant within-subject effect for time (Wilk's $\lambda = .85, F(3,69) = 3.53, P = .001$ ), with athletes exhibiting higher levels of depression symptoms from baseline at 2 days ( $P = .001$ ), 7 days ( $P = .006$ ), and 14 days post concussion ( $P = .04$ ). There were no significant between-subject effects for age ( $F(1,60) = .59, P = .45$ ) and sex ( $F(1,60) = 3.74, P = .06$ ) on depression.                                                                                                                                                                                                                                                                                                                                                                                                                                                              |
| Lamb et al.     | Generalized Anxiety Disorder Scale (GAD-7)                                                 | salivary IgA/total protein               | Health (pre- and post-season) | Anxiety                | The proportion of subjects reporting "severe anxiety" on an anxiety scale (GAD-7) were significantly greater in the "off-season" group compared to the "in-season" group ( $p = 0.047$ , Chi-squared test). "In-season" athletes had significantly higher salivary IgA/total protein levels than "off-season" athletes (one-sided Student's $t$ -test; $p = 0.03$ ). Anxiety levels (GAD-7) in the "in-season" group were positively correlated with growth of oral bacteria on blood agar (Spearman Rank correlation coefficient of 0.622 for "in-season", $p$ value = 0.033 one-sided) and mitis salivarius agar (Spearman Rank                                                                                                                                                                                                                                                                                                                                                                                     |

|                    |                                                                                                 |                                             |                         |                        |                                                                                                                                                                                                                                                                                                                                                                                                                                                                                                                                                                                                                                                                                                                                                                                                                                                                                                         |
|--------------------|-------------------------------------------------------------------------------------------------|---------------------------------------------|-------------------------|------------------------|---------------------------------------------------------------------------------------------------------------------------------------------------------------------------------------------------------------------------------------------------------------------------------------------------------------------------------------------------------------------------------------------------------------------------------------------------------------------------------------------------------------------------------------------------------------------------------------------------------------------------------------------------------------------------------------------------------------------------------------------------------------------------------------------------------------------------------------------------------------------------------------------------------|
|                    |                                                                                                 |                                             |                         |                        | correlation coefficient = 0.671 for “in-season, p value = 0.021 one-sided), and negatively correlated in “off-season” athletes on blood agar (– 0.689 for “off-season”, p value = 0.028 one-sided), supporting the hypothesis that the microbiota are distinct in “in- season” and “off-season” athletes and may be associated with anxiety levels.                                                                                                                                                                                                                                                                                                                                                                                                                                                                                                                                                     |
| Leone et al.       | Beck Depression Inventory, Perceived Stress Scale                                               | Celiac Disease                              | Health                  | Depression and stress  | Athletes were 3.85 times (95% CI, 0.42-34.89) more likely to report a celiac disease (CD) diagnosis and were 18.36 times (95% CI, 2.40-140.48) more likely to report a high degree of CD symptoms than the general population. Athletes with more symptoms had higher depression and perceived stress scores. There was a significant positive relationship between celiac symptom inventory (CSI) scores and Beck Depression Index (BDI) scores ( $r = 0.62$ ; 95% CI, 0.50-0.71; $P < 0.05$ ; $n = 138$ ; $r^2 = 0.38$ ). The Perceived Stress Scale (PSS-14) also was significantly positively correlated with the CSI ( $r = 0.53$ ; 95% CI, 0.39-0.65; $P < 0.05$ ; $n = 125$ ; $r^2 = 0.28$ ).                                                                                                                                                                                                    |
| Mikesell et al.    | Patient Health Questionnaire (PHQ-2); Perceived Stress Scale (PSS-10)                           | Resilience; Self-Compassion; Social Support | Support                 | Depression and stress  | Correlations between depression and social support (family) was $-.36$ , while correlations between depression and social support (friends) and depression was $-.24$ . Correlations between perceived stress and social support (family) was $-.27$ , while correlations between depression and social support (friends) and depression was $-.22$ . This inverse relationship is consistent with past research among collegiate athletes during COVID-19.                                                                                                                                                                                                                                                                                                                                                                                                                                             |
| Miller et al.      | Beck Depression Inventory; Mini-International Neuropsychiatric Inventory; Symptoms Checklist 90 | Alcohol Use                                 | Health                  | Depression and anxiety | These results demonstrate that the alcohol abusing group (as assessed by a positive score on the AUDIT) report higher levels for depressive. In addition, this study reveals that as the severity of depressive and general symptoms increases in all subjects so does the level of alcohol misuse. The subjects with levels of depression or anxiety in the “clinical” range also reported heavy alcohol use.                                                                                                                                                                                                                                                                                                                                                                                                                                                                                          |
| O'Connor et al.    | Profile of Mood States                                                                          | Training Volume; Salvatory Cortisol         | Training Volume; Health | Depression             | One-way repeated measures ANOVAs revealed that the swimmers had significant alterations in depression during overtraining. Depression returned to baseline levels following the taper. Salivary cortisol was unrelated to depression during the baseline and taper phases, but it was significantly correlated during overtraining ( $r = .50$ ; $p < 0.05$ ).                                                                                                                                                                                                                                                                                                                                                                                                                                                                                                                                          |
| Pierce, E. F., Jr. | Profile of Mood States                                                                          | Training Volume                             | Training Volume         | Depression             | Correlations between training volume and depression (.27) was not significant.                                                                                                                                                                                                                                                                                                                                                                                                                                                                                                                                                                                                                                                                                                                                                                                                                          |
| Powers et al.      | Center for Epidemiological Studies Depression Scale (CES-D); Beck Anxiety Inventory             | Athlete-Coach relationship; Personality     | Support                 | Depression and anxiety | In predicting depression, only the model including coach–athlete relationship as a predictor was significant, with a medium effect size, $F(7,61) = 2.22$ , $p = .045$ , $R^2 = .21$ . The combination of gender, personality, and coach–athlete relationship predicted 21% of the variance in depression scores. Adding coach–athlete relationship on the second step of the hierarchical regression accounted for an additional 15% of the variance in depression, $\Delta F(1, 60) = 11.37$ , $p = .001$ , $\Delta R^2 = .15$ . Regarding specific predictors, only coach–athlete relationship ( $\beta = -.43$ , $p = .001$ ) was a significant predictor of depression, where a stronger coach–athlete relationship was associated with lower depression scores. Neither model was significant in predicting anxiety. Gender and personality had a statistically nonsignificant contribution of 5% |

|                |                                                                     |                                              |                          |                        |                                                                                                                                                                                                                                                                                                                                                                                                                                                                                                                                                                                                                                                                                                                                                                                                                                                                                                                                                                                      |
|----------------|---------------------------------------------------------------------|----------------------------------------------|--------------------------|------------------------|--------------------------------------------------------------------------------------------------------------------------------------------------------------------------------------------------------------------------------------------------------------------------------------------------------------------------------------------------------------------------------------------------------------------------------------------------------------------------------------------------------------------------------------------------------------------------------------------------------------------------------------------------------------------------------------------------------------------------------------------------------------------------------------------------------------------------------------------------------------------------------------------------------------------------------------------------------------------------------------|
|                |                                                                     |                                              |                          |                        | to the anxiety scores with a small effect size, $F(6,60) = 0.54$ , $p = .777$ , $R^2 = .05$ , and the model including coach-athlete relationship had a non-significant contribution of 11%, $\Delta F(7,59) = 1.05$ , $p = .407$ , $\Delta R^2 = .11$ .                                                                                                                                                                                                                                                                                                                                                                                                                                                                                                                                                                                                                                                                                                                              |
| Raglin et al.  | State-Trait Anxiety Inventory                                       | Exercise Type: Ergometry and Weight Training | Intervention             | Anxiety                | Repeated-measures ANOVA detected significant ( $P < 0.05$ ) trial by condition effects for state anxiety. State anxiety increased ( $P < 0.00$ ) immediately following weight training but returned to baseline for the remaining assessments. State anxiety decreased ( $P < 0.05$ ) below baseline at 60 min following ergometry. In summary, state anxiety response to acute physical activity appears to be dependent on the exercise mode with reductions in state anxiety associated with ergometry but not weight training.                                                                                                                                                                                                                                                                                                                                                                                                                                                   |
| Roby et al.    | Brief Symptom Inventory 18                                          | Concussion                                   | Injury; Biological Sex   | Depression and anxiety | A significant sex-by-concussion history interaction was found for the anxiety subscale (chi-square = $-0.98$ , $P < .01$ ) such that women with a concussion history reported significantly higher anxiety scores than men. When examining the probability of a student-athlete reporting zero symptoms versus any symptoms, men were more likely to endorse zeros relative to women for BSI-18 total score (chi-square = $1.41$ , $P < .01$ ), depression (chi-square = $0.84$ , $P < .01$ ), anxiety (chi-square = $1.43$ , $P < .01$ ), and somatization (chi-square = $1.55$ , $P < .01$ ). Men were 2.3 times more likely to endorse zero depression symptoms, 4.2 times more likely to endorse zero anxiety symptoms, 4.7 times more likely to endorse zero somatization symptoms, and 4.1 times more likely to endorse zero as a total score on the BSI-18.                                                                                                                   |
| Roiger et al.  | Center for Epidemiological Studies Depression Scale (CES-D)         | Concussion                                   | Injury                   | Depression             | No differences in baseline depressive symptoms among subgroups were noted. After an increase between baseline and 1 week (4.3, 95% confidence interval [CI] = $0.41, 8.16$ , $P = .02$ ), depressive symptoms in the concussion group decreased between 1 week and 1 month (2.7, 95% CI = $4.96, 0.47$ , $P = .01$ ) and between 1 week and 3 months (4.0, 95% CI = $6.50, 1.49$ , $P = .004$ ). The injured/nonconcussed group showed differences between baseline and 1 week (4.6, 95% CI = $1.08, 8.17$ , $P = .009$ ) and between baseline and 1 month (3.2, 95% CI = $0.05, 6.30$ , $P = .03$ ). No significant differences were present in depressive symptoms between concussed participants and injured/nonconcussed participants at any of the postinjury time points.                                                                                                                                                                                                      |
| Sanborn et al. | Beck Anxiety Inventory; Depression, Anxiety, Stress Scale (DASS-21) | COVID-19 Anxiety; Biological Sex             | COVID-19; Biological Sex | Depression and anxiety | Female student-athletes exhibited significantly higher scores on DASS-21 subscales of stress, $t(435) = -4.46$ , $p < .01$ , $1.97 \pm 2.96$ versus $0.90 \pm 1.96$ ; anxiety, $t(434) = -3.09$ , $p < .01$ , $1.09 \pm 2.13$ versus $0.55 \pm 1.44$ ; and depression, $t(435) = -2.48$ , $p = .01$ , $1.16 \pm 2.55$ versus $0.62 \pm 2.01$ , compared with male student-athletes. There was also a significant difference on the DASS-21 subscale of anxiety between those who responded after versus before fall sport postponement, $t(434) = -2.55$ , $p = .01$ , $0.65 \pm 1.59$ versus $1.10 \pm 2.15$ , such that scores were lower among athletes who responded to the survey after the announcement. No other differences on DASS-21 subscale scores were identified in student-athletes who responded before versus after postponement or between fall versus spring athletes (all $p$ 's $< .05$ ). Given the significant differences identified between male and female |

|                 |                                                                                              |                         |                 |                        |                                                                                                                                                                                                                                                                                                                                                                                                                                                                                                                                                                                                                                                                                                                                     |
|-----------------|----------------------------------------------------------------------------------------------|-------------------------|-----------------|------------------------|-------------------------------------------------------------------------------------------------------------------------------------------------------------------------------------------------------------------------------------------------------------------------------------------------------------------------------------------------------------------------------------------------------------------------------------------------------------------------------------------------------------------------------------------------------------------------------------------------------------------------------------------------------------------------------------------------------------------------------------|
|                 |                                                                                              |                         |                 |                        | student-athletes on DASS-21 subscales, multivariate analysis of variance including the before versus after postponement variable and sex was conducted and showed that the difference in the anxiety subscale among subgroups was no longer significant when controlling for sex ( $p < .05$ ).                                                                                                                                                                                                                                                                                                                                                                                                                                     |
| Slavin et al.   | Patient Health Questionnaire (PHQ-2); Perceived Stress Scale (PSS-10)                        | Biological Sex          | Biological Sex  | Depression and stress  | Female student-athletes reported higher rates of depression ( $1.88 \pm 1.64$ ) and stress ( $19.65 \pm 6.14$ ).                                                                                                                                                                                                                                                                                                                                                                                                                                                                                                                                                                                                                    |
| Storch et al.   | Social Anxiety Scale for Adolescents; Personality Assessment Inventory (Depression Subscale) | Religious Faith         | Religion        | Depression and anxiety | Religious faith was not significantly correlated with depressive symptoms ( $r = .05$ ), trait anxiety ( $r = .08$ ), or loneliness ( $r = -.09$ ).                                                                                                                                                                                                                                                                                                                                                                                                                                                                                                                                                                                 |
| Storch et al.   | Beck Depression Inventory; State-Trait Anxiety Inventory-Trait version                       | Psychosocial Adjustment | Health; Support | Depression and anxiety | Inspection of the plot of means and univariate tests revealed that female athletes have higher depression scores, $F(1, 388) = 8.13$ , $p = .01$ , and social anxiety scores, $F(1, 388) = 4.45$ , $p = .04$ , compared to male athletes and male and female non-athletes. Level of support also varied as a function of gender and athletic status with female athletes and male non-athletes reporting less support than male athletes and female non-athletes, $F(1, 388) = 5.67$ , $p = .02$ .                                                                                                                                                                                                                                  |
| Storch et al.   | Social Anxiety Scale for Adolescents; Personality Assessment Inventory (Depression Subscale) | Religious Faith         | Religion        | Depression             | Findings indicated that after controlling for gender in step one, only intrinsic religiosity was significantly associated with affective symptoms of depression, $F(2, 103) = 4.04$ , $p < .01$ , $r = -.20$ , Standardized Beta = $-.20$ . An increase of one standard deviation in intrinsic religiosity was associated with a 20% decreased likelihood of affective symptoms of depression. No other significant associations were found between religiosity and depressive symptoms ( $p > .05$ ).                                                                                                                                                                                                                              |
| Sullivan et al. | Center for Epidemiological Studies Depression Scale (CES-D); State-Trait Anxiety Inventory   | Social Support          | Support         | Depression and anxiety | The overall amount of social support increased from baseline to 1-week post-injury ( $p < 0.05$ ) and then remained unchanged until RTP. The overall satisfaction with the support received increased from baseline to 1-week post-injury ( $p < 0.05$ ) but decreased ( $p < 0.05$ ) from 1-week post-injury to RTP. Increases in satisfaction with the support received were associated with decreases in post-injury depressive ( $\beta = -0.404$ ), $p < 0.0001$ ) and anxiety symptoms ( $\beta = -0.406$ ), $p < 0.0001$ ).                                                                                                                                                                                                  |
| Sullivan et al. | Center for Epidemiological Studies Depression Scale (CES-D)                                  | Social Support          | Support         | Depression             | Results indicated weak, negative relationships (ranging between $r = -.38$ to $r = -.31$ ) between all types of social support and CES-D score, with athletic tangible ( $r = -.38$ ) support having the strongest correlation compared to the other support types. Perceived tangible support from athletic sources, need for support, and perceived tangible support from personal sources were significant predictors of CES-D scores, ( $F = 23.2$ , $p < .001$ ). Athletic tangible support was the strongest predictor of CES-D score with a beta of $-.30$ ( $p < .001$ ), and accounting for 15.1% of variance. Need for support was the second strongest predictor of CES-D score with a beta of $.23$ ( $p < .001$ ), and |



|                  |                                                                                  |                                |                                         |                        |                                                                                                                                                                                                                                                                                                                                                                                                                                                                                                                                                                                                                                                                                                                                                                                                                                                                                                                                                                                                                                                                                                                                                                                                                                                                                                                                                                                                                                                                                                                                               |
|------------------|----------------------------------------------------------------------------------|--------------------------------|-----------------------------------------|------------------------|-----------------------------------------------------------------------------------------------------------------------------------------------------------------------------------------------------------------------------------------------------------------------------------------------------------------------------------------------------------------------------------------------------------------------------------------------------------------------------------------------------------------------------------------------------------------------------------------------------------------------------------------------------------------------------------------------------------------------------------------------------------------------------------------------------------------------------------------------------------------------------------------------------------------------------------------------------------------------------------------------------------------------------------------------------------------------------------------------------------------------------------------------------------------------------------------------------------------------------------------------------------------------------------------------------------------------------------------------------------------------------------------------------------------------------------------------------------------------------------------------------------------------------------------------|
|                  |                                                                                  |                                |                                         |                        | accounting for 4.3% of variance. Personal tangible support was the third strongest predictor of CES-D score with a beta of $-.22$ ( $p < .001$ ), and accounting for 3.5% of change.                                                                                                                                                                                                                                                                                                                                                                                                                                                                                                                                                                                                                                                                                                                                                                                                                                                                                                                                                                                                                                                                                                                                                                                                                                                                                                                                                          |
| Tobar, David A.  | Profile of Mood States; State-Trait Anxiety Inventory                            | Training Volume                | Training Volume; Anxiety groups         | Depression and anxiety | For the interaction effect of trait anxiety and time (across gender), there was a significant effect for depression ( $p < .05$ , $\eta^2 = .03$ ). Post hoc tests revealed significant differences between low and high trait anxiety groups at baseline for depression ( $p < .001$ , $d = .83$ ). The high trait anxiety group reported higher scores but no difference ( $p > .05$ ) between anxiety groups at peak training or taper. For the low trait anxiety group, depression ( $p < .001$ ) significantly increased from baseline to peak training. Depression improved ( $p < .05$ ) from peak training to taper for both anxiety groups, and the scores at taper were different in depression in the high trait anxiety group only ( $p < .005$ ).                                                                                                                                                                                                                                                                                                                                                                                                                                                                                                                                                                                                                                                                                                                                                                                |
| Tomlinson et al. | Center for Epidemiological Studies Depression Scale (CES-D)                      | Serum Vitamin D and Ferritin   | Health (pre- and post-season)           | Depression             | A pre- to post- season increase in depression score was noted, of medium magnitude of effect (6.0 to 8.9; $p = 0.009$ ; effect size = 0.53). Two athletes (one male, one female; 3.9%) demonstrated clinically relevant ( $CES-D \geq 16$ ) depression pre-season ( $19.5 \pm 4.9$ ), which persisted into post-season ( $21.0 \pm 7.1$ ). These two participants had lower vitamin D levels pre-season ( $28.0 \pm 0.2$ vs. $49.4 \pm 20.0$ ng/mL; $p = 0.13$ ; effect size = 1.52) and post-season ( $27.7 \pm 0.9$ vs. $43.9 \pm 18.2$ ng/mL; $p = 0.21$ ; effect size = 1.27) (non-depressed vs. depressed athletes, respectively). Pre-season ferritin ( $81.8 \pm 60.0$ ng/mL) and post-season ferritin ( $75.2 \pm 63.9$ ng/mL) levels were within normal limits for these two athletes and neither participant sustained a fracture during the season. Seven athletes (two males, five females; 13.7%) demonstrated depression post-season, with medium magnitudes of effect for both lower pre-season serum vitamin D and ferritin. There were inverse relationships between serum vitamin D vs. CES-D scores pre-season and post-season, with small magnitudes of effect. An inverse relationship was found between post-season serum ferritin vs. post-season CES-D scores in the female cohort only, with a medium magnitude of effect. There were no other meaningful relationships noted between depression scores, serum vitamin D, and/or serum ferritin levels pre- or post-season (in males, females, or combined cohorts). |
| Tran, AGTT       | Patient Health Questionnaire (PHQ-9); Generalized Anxiety Disorder Scale (GAD-7) | Discrimination and stereotypes | Race; Exercise-level (Being an athlete) | Depression and anxiety | Discrimination was positively linked to depression for Asian-identified nonstudent-athletes, regardless of exercise amount. Conversely and as expected, the associations were significant for Asian-identified student-athletes reporting a below-average amount of hourly exercise but nonsignificant for those reporting an above-average amount of hourly exercise. Following this pattern, discrimination was negatively correlated with positive mental health for Asian-identified student-athletes who exercised a below-average amount and Asian-identified nonstudent-athletes regardless of exercise amount, whereas the association was not significant for Asian-identified student-athletes who exercised an above-average level. Discrimination was positively correlated with anxiety regardless of exercise amount for both Asian-identified student-athletes and nonstudent-athletes.                                                                                                                                                                                                                                                                                                                                                                                                                                                                                                                                                                                                                                        |

|                |                                                                                                  |                                        |                       |                        |                                                                                                                                                                                                                                                                                                                                                                                                                                                                                                                                                                                                                                                                                                                                                                                                                                                                                 |
|----------------|--------------------------------------------------------------------------------------------------|----------------------------------------|-----------------------|------------------------|---------------------------------------------------------------------------------------------------------------------------------------------------------------------------------------------------------------------------------------------------------------------------------------------------------------------------------------------------------------------------------------------------------------------------------------------------------------------------------------------------------------------------------------------------------------------------------------------------------------------------------------------------------------------------------------------------------------------------------------------------------------------------------------------------------------------------------------------------------------------------------|
|                |                                                                                                  |                                        |                       |                        | Tests of differences between pairs of slopes revealed that the slope of the below-average amount of exercise student-athlete group was significantly steeper than that of the above-average student-athlete group. This buffering was unique to student-athletes, as slopes did not differ for nonstudent-athletes.                                                                                                                                                                                                                                                                                                                                                                                                                                                                                                                                                             |
| Turner et al.  | Profile of Mood States; State-Trait Anxiety Inventory                                            | Concussions & Musculoskeletal Injuries | Injury                | Depression and anxiety | There were no significant interactions, ( $F(2, 86) = .05, p = .96, \eta^2 = .001$ ) or main effects for group ( $F(2, 86) = 6.32, p = .014, \eta^2 = .073$ ) or time ( $F(2, 86) = 4.53, p = .014, \eta^2 = .102$ ) for the Tension-Anxiety subscale. There was no interaction ( $F(2, 86) = 1.02, p = .386, \eta^2 = .027$ ) or main effect by group ( $F(2, 86) = .66, p = .420, \eta^2 = .006$ ) or time ( $F(2, 86) = 2.14, p = .099, \eta^2 = .054$ ) for the state anxiety subscale of the STAI. No significant interactions were found for the Depression-Dejection subscale ( $F(2, 86) = .92, p = .402, \eta^2 = .022$ ). In addition, no main effects for group were found, ( $F(2, 86) = 4.87, p = .030, \eta^2 = .057$ ).                                                                                                                                          |
| Valster et al. | Beck Anxiety Inventory; Harvard Department of Psychiatry/National Depression Screening Day Scale | Sport participation variation          | Sport; Biological Sex | Depression and anxiety | A chi-square analysis showed a gender-dependent significant difference in expected and observed values in both Year 1 ( $\chi^2 = 4.990, p = .025, \eta^2 = .097$ ) and Year 2 ( $\chi^2 = 9.054, p = .003, \eta^2 = .130$ ) for the HANDS screening but not by sport (Year 1: $p = .068$ ; Year 2: $p = .608$ ). A chi-square analysis of the BAI screening showed a gender-dependent significant difference in expected and observed values in both Year 1 ( $\chi^2 = 9.422, p = .002, \eta^2 = .134$ ) and Year 2 ( $\chi^2 = 8.126, p = .004, \eta^2 = .129$ ). A non-significant difference in sport type was found for the BAI screening (Year 1: $p = .827$ ; Year 2: $p = .237$ ).                                                                                                                                                                                     |
| Vargas et al.  | Beck Depression Inventory-Fast Screen                                                            | Concussion                             | Injury                | Depression             | Concussed athletes were more likely to show a reliable increase in depression symptoms than control participants (Chi-square = 5.2, $P = .02$ ). We also found several predictors of post-concussion depressive symptoms (PCDS) in the athletes, including baseline depression symptoms ( $r = 0.37, P = .001$ ), baseline postconcussion symptoms ( $r = 0.25, P = .03$ ), estimated premorbid intelligence (full-scale IQ; $r = 0.29, P = .009$ ), and age of first participation in organized sport ( $r = 0.34, P = .002$ ). For the control group, predictors of depression symptoms at time 2 were number of previous head injuries ( $r = 0.31, P = .05$ ) and baseline depression symptoms ( $r = 0.80, P = .001$ ).                                                                                                                                                    |
| Weber et al.   | Hospital Anxiety and Depression Scale                                                            | Concussion                             | Injury                | Depression and anxiety | There was not an interaction between group and time for HADS-D ( $F_{4,497} = 0.78, p = 0.537$ ) or HADS-A subscores ( $F_{4,497} = 0.93, p = 0.446$ ). There was a main effect for concussion history group for HADS-D ( $F_{1,179} = 5.43, p = 0.021$ ), but not for HADS-A ( $F_{1,179} = 1.67, p = 0.198$ ). Student-athletes with one or more concussions had worse HADS-D subscores (mean = 2.16, 95% CI 1.73–2.58) compared to those without a concussion history (mean = 1.74, 1.08–1.87), although both means remained within the normal group range. There was a main effect for time on HADS-D ( $F_{4,497} = 30.14, p < 0.001$ ), revealing that HADS-D subscores were significantly worse than baseline at 24–48 h ( $p < 0.001$ ), but then became significantly better than baseline at the asymptomatic ( $p < 0.001$ ), return-to-play ( $p < 0.001$ ), and 6- |

|                    |                                                                                            |                                             |                                      |                        |                                                                                                                                                                                                                                                                                                                                                                                                                                                                                                                                                                                                                                                                                                                                                                                                                                                                                                                                                                                                                                                                                                                                                                                                                                                                                                     |
|--------------------|--------------------------------------------------------------------------------------------|---------------------------------------------|--------------------------------------|------------------------|-----------------------------------------------------------------------------------------------------------------------------------------------------------------------------------------------------------------------------------------------------------------------------------------------------------------------------------------------------------------------------------------------------------------------------------------------------------------------------------------------------------------------------------------------------------------------------------------------------------------------------------------------------------------------------------------------------------------------------------------------------------------------------------------------------------------------------------------------------------------------------------------------------------------------------------------------------------------------------------------------------------------------------------------------------------------------------------------------------------------------------------------------------------------------------------------------------------------------------------------------------------------------------------------------------|
|                    |                                                                                            |                                             |                                      |                        | month ( $p < 0.001$ ) time points (Fig. 3). There was also a main effect for time on the HADS-A subscore ( $F_{4,497} = 54.77, p < 0.001$ ) such that HADS-A subscores were significantly worse at baseline compared to the asymptomatic ( $p < 0.001$ ), return-to-play ( $p < 0.001$ ), and 6-month ( $p < 0.001$ ) time points (Fig. 4) but did not differ at 24–48 h ( $p = 0.084$ ).                                                                                                                                                                                                                                                                                                                                                                                                                                                                                                                                                                                                                                                                                                                                                                                                                                                                                                           |
| Weber et al.       | Center for Epidemiological Studies Depression Scale (CES-D); State-Trait Anxiety Inventory | Biological Sex; Academic Status; Sport Type | Biological Sex; Academic Year; Sport | Depression and anxiety | A Chi-squared analysis revealed no significant differences between the CES-D and sex ( $X^2_{1,615} = 0.00, p = 0.99$ , with females (13.8%) reporting the same risk as males (8.5%)), though it suggests that depression and anxiety signs and symptoms are present in the student-athlete population, with females predominantly more at risk than males. No significant differences were identified for depression risk and academic status ( $(X^2_{3,615} = 6.36, p = 0.095)$ , with sophomores ( $n = 45/154, 29.2%$ ) and juniors ( $n = 33/149, 22.1%$ ) reporting the highest depression risk. A Chi-squared analysis revealed no significant differences between the CES-D and sport type ( $X^2_{4,615} = 3.427, p = 0.489$ ), with ball ( $n = 48/194, 24.7%$ ) and power ( $n = 28/117, 23.9%$ ) sports reporting the highest risk. A Chi-squared analysis revealed a significant difference for state anxiety and sex ( $X^2_{2,615} = 10.46, p = 0.005$ ), and for trait anxiety and sex ( $X^2_{2,615} = 10.32, p = 0.006$ ). There were no differences found for state and trait anxiety for academic status ( $X^2_{6,615} = 3.53, p = 0.740$ ), ( $X^2_{6,615} = 4.42, p = 0.620$ ) or for sport type ( $X^2_{8,615} = 12.25, p = 0.141$ ), ( $X^2_{6,158} = 4.27, p = 0.832$ ). |
| Wilson & Pritchard | Personality Assessment Inventory (Depression Subscale)                                     | Support; Time; Sleep                        | Health; Support                      | Stress                 | Student athletes reported more stress than did non-athletes in a wide variety of variables; specifically those that dealt with conflicts with a boyfriend's or girlfriend's family, $t(359) = 2.53, p < .05$ , to having a lot of responsibilities, $t(357) = 1.96, p < .05$ , not getting enough time for sleep, $t(357) = 1.98, p < .05$ , and having heavy demands from extracurricular activities, $t(359) = 8.81, p < .001$ .                                                                                                                                                                                                                                                                                                                                                                                                                                                                                                                                                                                                                                                                                                                                                                                                                                                                  |
| Wilson et al.      | Beck Anxiety Inventory                                                                     | Omega 3 Fatty Acids                         | Health                               | Anxiety                | Blood levels of the HS-Omega-3 Index ( $\rho = -0.32, p = 0.02$ ), eicosapentaenoic acid ( $\rho = -0.40, p = 0.003$ ), and docosapentaenoic acid ( $\rho = -0.33, p = 0.02$ ) were negatively correlated with Beck Anxiety Inventory (BAI) scores. Likewise, dietary intakes of eicosapentaenoic acid ( $\rho = -0.38, p = 0.007$ ) and docosahexaenoic acid ( $\rho = -0.35, p = 0.02$ ) were negatively correlated with BAI scores.                                                                                                                                                                                                                                                                                                                                                                                                                                                                                                                                                                                                                                                                                                                                                                                                                                                              |
| Wolanin et al.     | Center for Epidemiological Studies Depression Scale (CES-D)                                | Sport; Biological Sex                       | Sport; Biological Sex                | Depression             | The prevalence rate for a clinically relevant level of depressive symptoms, as measured on the CES-D ( $\text{CES-D} \geq 16$ ), was 23.7%. A moderate to severe level of depressive symptoms was reported by 6.3%. There was a significant gender difference in prevalence of depressive symptoms, $\chi^2(1) = 7.459, p = 0.006$ , with female athletes exhibiting 1.844 times the risk of male athletes for endorsing clinically relevant symptoms.                                                                                                                                                                                                                                                                                                                                                                                                                                                                                                                                                                                                                                                                                                                                                                                                                                              |

|             |                                                                                            |                                       |                                       |                        |                                                                                                                                                                                                                                                                                                                                                                                                                                                                                                                                                                                                                                                                                                                                                                   |
|-------------|--------------------------------------------------------------------------------------------|---------------------------------------|---------------------------------------|------------------------|-------------------------------------------------------------------------------------------------------------------------------------------------------------------------------------------------------------------------------------------------------------------------------------------------------------------------------------------------------------------------------------------------------------------------------------------------------------------------------------------------------------------------------------------------------------------------------------------------------------------------------------------------------------------------------------------------------------------------------------------------------------------|
| Yang et al. | Center for Epidemiological Studies Depression Scale (CES-D); State-Trait Anxiety Inventory | Athletic Trainer Social Support       | Support                               | Depression and anxiety | In 84.3% (n = 501) of injury events, injured athletes received social support from ATs during their recovery. Of these, 264 (53.1%) athletes reported being very satisfied with this social support. Whether or not athletes received social support from ATs during recovery did not affect the symptoms of depression or anxiety experienced at return to play. However, compared with athletes who were dissatisfied with the social support received from ATs, athletes who were very satisfied or satisfied with this social support were 87% (95% confidence interval = 0.06, 0.30) and 70% (95% confidence interval = 0.13, 0.70) less likely to report symptoms of depression at return to play, respectively. Similar results were observed for anxiety. |
| Yang et al. | Center for Epidemiological Studies Depression Scale (CES-D); State-Trait Anxiety Inventory | Biological Sex; Academic Year; Injury | Biological Sex; Academic Year; Injury | Depression             | Athletes who were female, freshmen, or with self-reported pain were associated with significantly increased odds of experiencing symptoms of depression after adjusting for sports and other covariates. In particular, female athletes had 1.32 greater odds (95% CI, 1.01 to 1.73) of experiencing symptoms of depression compared to male student athletes. Freshmen had 3.27 greater odds (95% CI, 1.63 to 6.59) of experiencing symptoms of depression than their more senior counterparts.                                                                                                                                                                                                                                                                  |

**Joanna Briggs Quality Assessment Items****Case-Control Studies**

1. Were the groups comparable other than the presence of disease in cases or the absence of disease in controls?
2. Were cases and controls matched appropriately?
3. Were the same criteria used for identification of cases and controls?
4. Was exposure measured in a standard, valid and reliable way?
5. Was exposure measured in the same way for cases and controls?
6. Were confounding factors identified?
7. Were strategies to deal with confounding factors stated?
8. Were outcomes assessed in a standard, valid and reliable way for cases and controls?
9. Was the exposure period of interest long enough to be meaningful?
10. Was appropriate statistical analysis used?

**Supplementary Table 4.** Critical appraisal for case-control studies.

| Study              | 1             | 2             | 3             | 4             | 5             | 6             | 7             | 8             | 9             | 10            | Total        |
|--------------------|---------------|---------------|---------------|---------------|---------------|---------------|---------------|---------------|---------------|---------------|--------------|
| Vargas et al. 2015 | X             | X             | X             | X             | X             | X             | X             | X             | X             | X             | 10/10 (100%) |
| <b>Total %</b>     | 1/1<br>(100%) |              |

Note. X – Yes; N – No; UC – Unclear; NR – Not Reported; N/A – Not Applicable

**Joanna Briggs Quality Assessment Items****Cohort Studies**

1. Were the two groups similar and recruited from the same population?
2. Were the exposures measured similarly to assign people to both exposed and unexposed groups?
3. Was the exposure measured in a valid and reliable way?
4. Were confounding factors identified?
5. Were strategies to deal with confounding factors stated?
6. Were the groups or participants free of the outcome at the start of the study (or moment of exposure)?
7. Were the outcomes measured in a valid and reliable way?
8. Was the follow up time reported and sufficient to be long enough for outcomes to occur?
9. Was follow up complete, and if not, were the reasons to loss to follow up described and explored?
10. Were strategies to address incomplete follow up utilised?
11. Was appropriate statistical analysis used?

**Supplementary Table 5.** Critical appraisal for cohort studies.

| Study                      | 1              | 2              | 3              | 4              | 5              | 6             | 7               | 8              | 9               | 10             | 11             | Total        |
|----------------------------|----------------|----------------|----------------|----------------|----------------|---------------|-----------------|----------------|-----------------|----------------|----------------|--------------|
| Anderson et al. 2023       | X              | X              | X              | UC             | N/A            | N             | X               | X              | X               | X              | X              | 8/11 (72.3%) |
| Benjamin et al. 2020       | X              | X              | X              | X              | X              | UC            | X               | X              | X               | X              | X              | 10/11 (90%)  |
| Graupensperger et al. 2020 | X              | X              | X              | X              | X              | X             | X               | X              | X               | X              | X              | 11/11 (100%) |
| Guo et al. 2018            | X              | X              | X              | X              | X              | X             | X               | X              | X               | X              | X              | 11/11 (100%) |
| Kontos et al. 2012         | X              | X              | X              | X              | X              | X             | X               | X              | X               | X              | X              | 11/11 (100%) |
| Miller et al. 2002         | X              | X              | X              | NR             | NR             | UC            | X               | X              | X               | X              | X              | 8/11 (72.3%) |
| O'Connor et al. 1989       | X              | N/A            | X              | NR             | NR             | UC            | X               | X              | X               | X              | X              | 7/11 (63.6%) |
| Pierce, E. F., Jr. 2002    | X              | X              | X              | NR             | NR             | UC            | X               | X              | X               | UC             | UC             | 6/11 (54.5%) |
| Raglin et al. 1993         | X              | X              | UC             | NR             | NR             | UC            | X               | UC             | X               | X              | X              | 6/11 (54.5%) |
| Roiger et al. 2015         | X              | X              | X              | NR             | NR             | X             | X               | X              | X               | X              | X              | 9/11 (81.8%) |
| Sullivan et al. 2022       | X              | X              | X              | X              | X              | X             | X               | X              | X               | X              | X              | 11/11 (100%) |
| Tobar, David A. 2012       | X              | X              | X              | NR             | NR             | UC            | X               | X              | X               | X              | X              | 8/11 (72.3%) |
| Tomlinson et al. 2021      | X              | X              | X              | X              | X              | UC            | X               | X              | X               | X              | X              | 10/11 (90%)  |
| Tumer et al. 2017          | X              | X              | X              | X              | UC             | N/A           | X               | X              | X               | X              | X              | 9/11 (81.8%) |
| Valster et al. 2022        | N/A            | UC             | X              | X              | X              | X             | X               | X              | X               | X              | X              | 9/11 (81.8%) |
| Weber et al. 2018          | X              | X              | X              | X              | X              | X             | X               | X              | X               | X              | X              | 11/11 (100%) |
| Yang et al. 2007           | X              | X              | X              | X              | X              | X             | X               | X              | X               | X              | X              | 11/11 (100%) |
| Yang et al. 2014           | X              | X              | X              | X              | X              | X             | X               | X              | X               | X              | X              | 11/11 (100%) |
| <b>Total %</b>             | 17/18<br>(94%) | 16/18<br>(89%) | 17/18<br>(94%) | 11/18<br>(61%) | 10/18<br>(55%) | 9/18<br>(50%) | 18/18<br>(100%) | 17/18<br>(94%) | 18/18<br>(100%) | 17/18<br>(94%) | 17/18<br>(94%) | 84.3%        |

Note. X – Yes; N – No; UC – Unclear; NR – Not Reported; N/A – Not Applicable

**Joanna Briggs Quality Assessment Items***Analytical cross-sectional studies*

1. Were the criteria for inclusion in the sample clearly defined?
2. Were the study subjects and the setting described in detail?
3. Was the exposure measured in a valid and reliable way?
4. Were objective, standard criteria used for measurement of the condition?
5. Were confounding factors identified??
6. Were strategies to deal with confounding factors stated?
7. Were the outcomes measured in a valid and reliable way?
8. Was appropriate statistical analysis used?

**Supplementary Table 6.** Critical appraisal for analytical cross-sectional studies.

| Study                        | 1              | 2               | 3               | 4               | 5              | 6              | 7              | 8              | Total       |
|------------------------------|----------------|-----------------|-----------------|-----------------|----------------|----------------|----------------|----------------|-------------|
| Armstrong & Oomen-Early 2009 | X              | X               | X               | X               | X              | X              | X              | X              | 8/8 (100%)  |
| Bravata et al. 2002          | X              | X               | X               | X               | NR             | NR             | X              | UC             | 5/8 (62.5%) |
| Brenner et al. 2023          | X              | X               | X               | X               | UC             | UC             | X              | X              | 6/8 (75%)   |
| Brown et al. 2021            | X              | X               | X               | X               | X              | X              | X              | X              | 8/8 (100%)  |
| Bullard, J.B. 2020           | X              | X               | X               | X               | X              | X              | UC             | UC             | 6/8 (75%)   |
| Chandler et al. 2021         | X              | X               | X               | X               | X              | X              | X              | X              | 8/8 (100%)  |
| Christensen et al. 2021      | X              | X               | X               | X               | X              | X              | X              | X              | 8/8 (100%)  |
| Covassin et al. 2014         | X              | X               | X               | X               | X              | X              | X              | X              | 8/8 (100%)  |
| Covassin et al. 2019         | X              | X               | X               | X               | NR             | NR             | X              | X              | 6/8 (75%)   |
| Cox et al. 2017              | X              | X               | X               | X               | X              | X              | X              | X              | 8/8 (100%)  |
| de Souza et al. 2019         | X              | X               | X               | X               | X              | X              | X              | X              | 8/8 (100%)  |
| Garver et al. 2021           | X              | X               | X               | X               | NR             | NR             | X              | X              | 6/8 (75%)   |
| Hagiwara et al. 2017         | X              | X               | X               | X               | X              | X              | X              | X              | 8/8 (100%)  |
| Lamb et al. 2017             | X              | X               | X               | X               | NR             | NR             | X              | X              | 6/8 (75%)   |
| Leone et al. 2020            | X              | X               | X               | X               | NR             | NR             | X              | X              | 6/8 (75%)   |
| Mikesell et al. 2023         | X              | X               | X               | X               | UC             | UC             | X              | X              | 6/8 (75%)   |
| Powers et al. 2020           | X              | X               | X               | X               | X              | X              | X              | X              | 8/8 (100%)  |
| Roby et al. 2021             | X              | X               | X               | X               | NR             | NR             | X              | X              | 6/8 (75%)   |
| Sanborn et al. 2021          | X              | X               | X               | X               | NR             | NR             | X              | X              | 6/8 (75%)   |
| Slavin et al. 2023           | X              | X               | X               | X               | UC             | UC             | X              | X              | 6/8 (75%)   |
| Storch et al. 2002           | X              | X               | X               | X               | NR             | NR             | X              | UC             | 5/8 (62.5%) |
| Storch et al. 2004           | X              | X               | X               | X               | NR             | NR             | X              | UC             | 5/8 (62.5%) |
| Storch et al. 2005           | UC             | X               | X               | X               | UC             | UC             | X              | X              | 5/8 (62.5%) |
| Sullivan et al. 2020         | X              | X               | X               | X               | X              | X              | X              | X              | 8/8 (100%)  |
| Tran, AGTT 2021              | X              | X               | X               | X               | X              | X              | X              | X              | 8/8 (100%)  |
| Weber et al. 2023            | X              | X               | X               | X               | UC             | UC             | X              | X              | 6/8 (75%)   |
| Wilson & Pritchard 2005      | X              | X               | X               | X               | UC             | UC             | X              | X              | 6/8 (75%)   |
| Wilson et al. 2017           | X              | X               | X               | X               | NR             | NR             | X              | X              | 6/8 (75%)   |
| Wolanin et al. 2016          | X              | X               | X               | X               | NR             | NR             | X              | X              | 6/8 (75%)   |
| <b>Total %</b>               | 28/29<br>(97%) | 29/29<br>(100%) | 29/29<br>(100%) | 29/29<br>(100%) | 11/29<br>(38%) | 11/29<br>(38%) | 28/29<br>(97%) | 26/29<br>(90%) | 82.3%       |

Note. X – Yes; N – No; UC – Unclear; NR – Not Reported; N/A – Not Applicable

**Joanna Briggs Quality Assessment Items*****Quasi-experimental studies***

1. Is it clear in the study what is the cause and what is the effect (i.e., there is no confusion about which variable comes first?)
2. Were the participants included in any comparisons similar?
3. Were the participants included in any comparisons receiving similar treatment/care other than exposure or intervention of interest?
4. Was there a control group?
5. Were there multiple measurements of the outcome both pre and post the intervention/exposure?
6. Was follow up complete and if not, were differences between groups in terms of their follow up adequately described and analysed?
7. Were the outcomes of participants included in any comparisons measured in the same way?
8. Were outcomes measured in a reliable way?
9. Was appropriate statistical analysis used?

**Supplementary Table 7.** Critical appraisal for quasi-experimental studies.

| <b>Study</b>            | <b>1</b>      | <b>2</b>       | <b>3</b>       | <b>4</b>       | <b>5</b>      | <b>6</b>      | <b>7</b>       | <b>8</b>      | <b>9</b>      | <b>Total</b>   |
|-------------------------|---------------|----------------|----------------|----------------|---------------|---------------|----------------|---------------|---------------|----------------|
| Appaneal et al. 2009    | X             | X              | X              | X              | X             | X             | X              | X             | X             | 9/9<br>(100%)  |
| Evers et al. 2021       | X             | N              | N              | N              | X             | X             | N/A            | X             | X             | 5/9<br>(55.5%) |
| Fogaca, Janaina L. 2018 | X             | X              | X              | X              | X             | X             | X              | X             | X             | 9/9<br>(100%)  |
| <b>Total %</b>          | 3/3<br>(100%) | 2/3<br>(66.7%) | 2/3<br>(66.7%) | 2/3<br>(66.7%) | 3/3<br>(100%) | 3/3<br>(100%) | 2/3<br>(66.7%) | 3/3<br>(100%) | 3/3<br>(100%) | 85.2%          |

Note. X – Yes; N – No; UC – Unclear; NR – Not Reported; N/A – Not Applicable



**Joanna Briggs Quality Assessment Items****Randomized controlled trials (RCTs)**

1. Was true randomization used for assignment of participants to treatment groups?
2. Was allocation to treatment groups concealed?
3. Were treatment groups similar at baseline?
4. Were participants blind to treatment assignment?
5. Were those delivering treatment blind to treatment assignment?
6. Were outcome assessors blind to treatment assignment?
7. Were treatment groups treated identically other than the intervention of interest?
8. Was follow-up complete and if not, were differences between groups in terms of their follow-up adequately described and analysed?
9. Were participants analysed in the groups to which they were randomized?
10. Were outcomes measured in the same way for treatment groups?
11. Were outcomes measured in a reliable way?
12. Was appropriate statistical analysis used?
13. Was the trial design appropriate, and any deviations from the standard RCT design (individual randomization, parallel groups) accounted for in the conduct and analysis of the trial?

**Supplementary Table 8.** Critical appraisal for randomized control trials.

| Study             | 1             | 2             | 3             | 4             | 5             | 6             | 7             | 8             | 9             | 10            | 11            | 12            | 13            | Total            |
|-------------------|---------------|---------------|---------------|---------------|---------------|---------------|---------------|---------------|---------------|---------------|---------------|---------------|---------------|------------------|
| Gross et al. 2003 | X             | N             | X             | N             | N             | X             | X             | X             | X             | X             | X             | X             | X             | 10/13<br>(76.9%) |
| <b>Total %</b>    | 1/1<br>(100%) | 76.9%            |

Note. X – Yes; N – No; UC – Unclear; NR – Not Reported; N/A – Not Applicable

**Supplementary Table 9.** Summary of critical appraisal tool used.

| <b>Study</b>            | <b>Year</b> | <b>Study Design</b>            | <b>Joanna Briggs Quality Assessment Tool Used</b>                              |
|-------------------------|-------------|--------------------------------|--------------------------------------------------------------------------------|
| Anderson et al.         | 2023        | Longitudinal                   | Checklist for Cohort Studies                                                   |
| Appaneal et al.         | 2009        | Quasi-experimental             | Checklist for Quasi-experimental Studies (non-randomized experimental studies) |
| Armstrong & Oomen-Early | 2009        | Cross-sectional                | Checklist for Analytical Cross-Sectional Studies                               |
| Benjamin et al.         | 2020        | Prospective Cohort Study       | Checklist for Cohort Studies                                                   |
| Bravata et al.          | 2002        | Cross-sectional                | Checklist for Analytical Cross-Sectional Studies                               |
| Brenner et al.          | 2023        | Cross-sectional                | Checklist for Analytical Cross-Sectional Studies                               |
| Brown et al.            | 2021        | Cross-sectional                | Checklist for Analytical Cross-Sectional Studies                               |
| Bullard, J.B.           | 2020        | Cross-sectional                | Checklist for Analytical Cross-Sectional Studies                               |
| Chandler et al.         | 2021        | Cross-sectional                | Checklist for Analytical Cross-Sectional Studies                               |
| Christensen et al.      | 2021        | Cross-sectional                | Checklist for Analytical Cross-Sectional Studies                               |
| Covassin et al.         | 2014        | Cross-sectional                | Checklist for Analytical Cross-Sectional Studies                               |
| Covassin et al.         | 2019        | Cross-sectional                | Checklist for Analytical Cross-Sectional Studies                               |
| Cox et al.              | 2017        | Cross-sectional                | Checklist for Analytical Cross-Sectional Studies                               |
| de Souza et al.         | 2019        | Cross-sectional                | Checklist for Analytical Cross-Sectional Studies                               |
| Evers et al.            | 2021        | Pilot Study/Quasi-experimental | Checklist for Quasi-experimental Studies (non-randomized experimental studies) |
| Fogaca, Janaina L.      | 2018        | Quasi-experimental             | Checklist for Quasi-experimental Studies (non-randomized experimental studies) |
| Garver et al.           | 2021        | Cross-sectional                | Checklist for Analytical Cross-Sectional Studies                               |
| Graupensperger et al.   | 2020        | Prospective Cohort Study       | Checklist for Cohort Studies                                                   |
| Gross et al.            | 2003        | Randomized Control Trial       | Checklist for Randomized Controlled Trials                                     |
| Guo et al.              | 2018        | Prospective Cohort Study       | Checklist for Cohort Studies                                                   |
| Hagiwara et al.         | 2017        | Cross-sectional                | Checklist for Analytical Cross-Sectional Studies                               |
| Kontos et al.           | 2012        | Longitudinal                   | Checklist for Cohort Studies                                                   |
| Lamb et al.             | 2017        | Pilot Study/Cross-sectional    | Checklist for Analytical Cross-Sectional Studies                               |
| Leone et al.            | 2020        | Cross-sectional                | Checklist for Analytical Cross-Sectional Studies                               |

|                    |      |                                              |                                                  |
|--------------------|------|----------------------------------------------|--------------------------------------------------|
| Mikesell et al.    | 2023 | Cross-sectional                              | Checklist for Analytical Cross-Sectional Studies |
| Miller et al.      | 2002 | Prospective Cohort Study                     | Checklist for Cohort Studies                     |
| O'Connor et al.    | 1989 | Cohort Study                                 | Checklist for Cohort Studies                     |
| Pierce, E. F., Jr. | 2002 | Prospective Cohort Study                     | Checklist for Cohort Studies                     |
| Powers et al.      | 2020 | Cross-sectional                              | Checklist for Analytical Cross-Sectional Studies |
| Raglin et al.      | 1993 | Prospective Cohort Study                     | Checklist for Cohort Studies                     |
| Roby et al.        | 2021 | Cross-sectional                              | Checklist for Analytical Cross-Sectional Studies |
| Roiger et al.      | 2015 | Descriptive Epidemiologic Study/Cohort Study | Checklist for Cohort Studies                     |
| Sanborn et al.     | 2021 | Cross-sectional                              | Checklist for Analytical Cross-Sectional Studies |
| Slavin et al.      | 2023 | Cross-sectional                              | Checklist for Analytical Cross-Sectional Studies |
| Storch et al.      | 2005 | Cross-sectional                              | Checklist for Analytical Cross-Sectional Studies |
| Storch et al.      | 2004 | Cross-sectional                              | Checklist for Analytical Cross-Sectional Studies |
| Storch et al.      | 2002 | Cross-sectional                              | Checklist for Analytical Cross-Sectional Studies |
| Sullivan et al.    | 2020 | Cross-sectional                              | Checklist for Analytical Cross-Sectional Studies |
| Sullivan et al.    | 2022 | Prospective Cohort Study                     | Checklist for Cohort Studies                     |
| Tobar, David A.    | 2012 | Prospective Cohort Study                     | Checklist for Cohort Studies                     |
| Tomlinson et al.   | 2021 | Prospective Observational Study              | Checklist for Cohort Studies                     |
| Tran, AGTT         | 2021 | Cross-sectional                              | Checklist for Analytical Cross-Sectional Studies |
| Turner et al.      | 2017 | Prospective Cohort Study                     | Checklist for Cohort Studies                     |
| Valster et al.     | 2022 | Nonexperimental Trend Study/Cohort Study     | Checklist for Cohort Studies                     |
| Vargas et al.      | 2015 | Case-control                                 | Checklist for Case-Control Studies               |
| Weber et al.       | 2018 | Prospective Cohort Study                     | Checklist for Cohort Studies                     |
| Weber et al.       | 2023 | Cross-sectional                              | Checklist for Analytical Cross-Sectional Studies |
| Wilson & Pritchard | 2005 | Cross-sectional                              | Checklist for Analytical Cross-Sectional Studies |
| Wilson et al.      | 2017 | Cross-sectional Observational                | Checklist for Analytical Cross-Sectional Studies |
| Wolanin et al.     | 2016 | Prospective Cohort Study                     | Checklist for Cohort Studies                     |
| Yang et al.        | 2014 | Cohort Study                                 | Checklist for Cohort Studies                     |
| Yang et al.        | 2007 | Prospective Cohort Study                     | Checklist for Cohort Studies                     |

**Supplementary Table 10.** PRISMA Abstract Checklist.

| Section and Topic       | Item # | Checklist item                                                                                                                                                                                                                                                                                        | Reported (Yes/No) |
|-------------------------|--------|-------------------------------------------------------------------------------------------------------------------------------------------------------------------------------------------------------------------------------------------------------------------------------------------------------|-------------------|
| <b>TITLE</b>            |        |                                                                                                                                                                                                                                                                                                       |                   |
| Title                   | 1      | Identify the report as a systematic review.                                                                                                                                                                                                                                                           | Yes               |
| <b>BACKGROUND</b>       |        |                                                                                                                                                                                                                                                                                                       |                   |
| Objectives              | 2      | Provide an explicit statement of the main objective(s) or question(s) the review addresses.                                                                                                                                                                                                           | Yes               |
| <b>METHODS</b>          |        |                                                                                                                                                                                                                                                                                                       |                   |
| Eligibility criteria    | 3      | Specify the inclusion and exclusion criteria for the review.                                                                                                                                                                                                                                          | Yes               |
| Information sources     | 4      | Specify the information sources (e.g. databases, registers) used to identify studies and the date when each was last searched.                                                                                                                                                                        | Yes               |
| Risk of bias            | 5      | Specify the methods used to assess risk of bias in the included studies.                                                                                                                                                                                                                              | Yes               |
| Synthesis of results    | 6      | Specify the methods used to present and synthesise results.                                                                                                                                                                                                                                           | Yes               |
| <b>RESULTS</b>          |        |                                                                                                                                                                                                                                                                                                       |                   |
| Included studies        | 7      | Give the total number of included studies and participants and summarise relevant characteristics of studies.                                                                                                                                                                                         | Yes               |
| Synthesis of results    | 8      | Present results for main outcomes, preferably indicating the number of included studies and participants for each. If meta-analysis was done, report the summary estimate and confidence/credible interval. If comparing groups, indicate the direction of the effect (i.e. which group is favoured). | Yes               |
| <b>DISCUSSION</b>       |        |                                                                                                                                                                                                                                                                                                       |                   |
| Limitations of evidence | 9      | Provide a brief summary of the limitations of the evidence included in the review (e.g. study risk of bias, inconsistency and imprecision).                                                                                                                                                           | Yes               |
| Interpretation          | 10     | Provide a general interpretation of the results and important implications.                                                                                                                                                                                                                           | Yes               |
| <b>OTHER</b>            |        |                                                                                                                                                                                                                                                                                                       |                   |
| Funding                 | 11     | Specify the primary source of funding for the review.                                                                                                                                                                                                                                                 | Yes               |
| Registration            | 12     | Provide the register name and registration number.                                                                                                                                                                                                                                                    | Yes               |

From: Page MJ, McKenzie JE, Bossuyt PM, Boutron I, Hoffmann TC, Mulrow CD, et al. The PRISMA 2020 statement: an updated guideline for reporting systematic reviews. *BMJ* 2021;372:n71. doi: 10.1136/bmj.n71

For more information, visit: <http://www.prisma-statement.org/>

**Supplementary Table 11.** PRISMA Checklist.

| Section and Topic             | Item # | Checklist item                                                                                                                                                                                                                                                                                       | Location where item is reported           |
|-------------------------------|--------|------------------------------------------------------------------------------------------------------------------------------------------------------------------------------------------------------------------------------------------------------------------------------------------------------|-------------------------------------------|
| <b>TITLE</b>                  |        |                                                                                                                                                                                                                                                                                                      |                                           |
| Title                         | 1      | Identify the report as a systematic review.                                                                                                                                                                                                                                                          | Title                                     |
| <b>ABSTRACT</b>               |        |                                                                                                                                                                                                                                                                                                      |                                           |
| Abstract                      | 2      | See the PRISMA 2020 for Abstracts checklist.                                                                                                                                                                                                                                                         | Supplemental Table 10                     |
| <b>INTRODUCTION</b>           |        |                                                                                                                                                                                                                                                                                                      |                                           |
| Rationale                     | 3      | Describe the rationale for the review in the context of existing knowledge.                                                                                                                                                                                                                          | Lines 1-47                                |
| Objectives                    | 4      | Provide an explicit statement of the objective(s) or question(s) the review addresses.                                                                                                                                                                                                               | Lines 48-55                               |
| <b>METHODS</b>                |        |                                                                                                                                                                                                                                                                                                      |                                           |
| Eligibility criteria          | 5      | Specify the inclusion and exclusion criteria for the review and how studies were grouped for the syntheses.                                                                                                                                                                                          | Lines 73-85                               |
| Information sources           | 6      | Specify all databases, registers, websites, organisations, reference lists and other sources searched or consulted to identify studies. Specify the date when each source was last searched or consulted.                                                                                            | Lines 64-71;<br>Supplemental Table 1      |
| Search strategy               | 7      | Present the full search strategies for all databases, registers and websites, including any filters and limits used.                                                                                                                                                                                 | Supplemental Table 1                      |
| Selection process             | 8      | Specify the methods used to decide whether a study met the inclusion criteria of the review, including how many reviewers screened each record and each report retrieved, whether they worked independently, and if applicable, details of automation tools used in the process.                     | Lines 87-93;<br>Supplemental Table 1      |
| Data collection process       | 9      | Specify the methods used to collect data from reports, including how many reviewers collected data from each report, whether they worked independently, any processes for obtaining or confirming data from study investigators, and if applicable, details of automation tools used in the process. | Lines 57- 62;<br>Supplemental Table 1     |
| Data items                    | 10a    | List and define all outcomes for which data were sought. Specify whether all results that were compatible with each outcome domain in each study were sought (e.g. for all measures, time points, analyses), and if not, the methods used to decide which results to collect.                        | Lines 106-112;<br>Supplemental Tables 2-3 |
|                               | 10b    | List and define all other variables for which data were sought (e.g. participant and intervention characteristics, funding sources). Describe any assumptions made about any missing or unclear information.                                                                                         | Supplemental Tables 2-3                   |
| Study risk of bias assessment | 11     | Specify the methods used to assess risk of bias in the included studies, including details of the tool(s) used, how many reviewers assessed each study and whether they worked independently, and if applicable, details of automation tools used in the process.                                    | Lines 95-104                              |

| Section and Topic             | Item # | Checklist item                                                                                                                                                                                                                                              | Location where item is reported |
|-------------------------------|--------|-------------------------------------------------------------------------------------------------------------------------------------------------------------------------------------------------------------------------------------------------------------|---------------------------------|
| Effect measures               | 12     | Specify for each outcome the effect measure(s) (e.g. risk ratio, mean difference) used in the synthesis or presentation of results.                                                                                                                         | Supplemental Figures 1-3        |
| Synthesis methods             | 13a    | Describe the processes used to decide which studies were eligible for each synthesis (e.g. tabulating the study intervention characteristics and comparing against the planned groups for each synthesis (item #5)).                                        | Lines 118-125                   |
|                               | 13b    | Describe any methods required to prepare the data for presentation or synthesis, such as handling of missing summary statistics, or data conversions.                                                                                                       | Lines 126-129                   |
|                               | 13c    | Describe any methods used to tabulate or visually display results of individual studies and syntheses.                                                                                                                                                      | Lines 131-133                   |
|                               | 13d    | Describe any methods used to synthesize results and provide a rationale for the choice(s). If meta-analysis was performed, describe the model(s), method(s) to identify the presence and extent of statistical heterogeneity, and software package(s) used. | Lines 126-137                   |
|                               | 13e    | Describe any methods used to explore possible causes of heterogeneity among study results (e.g. subgroup analysis, meta-regression).                                                                                                                        | Lines 135-137                   |
|                               | 13f    | Describe any sensitivity analyses conducted to assess robustness of the synthesized results.                                                                                                                                                                | Lines 116-133                   |
| Reporting bias assessment     | 14     | Describe any methods used to assess risk of bias due to missing results in a synthesis (arising from reporting biases).                                                                                                                                     | Lines 95-104                    |
| Certainty assessment          | 15     | Describe any methods used to assess certainty (or confidence) in the body of evidence for an outcome.                                                                                                                                                       | Lines 126-129                   |
| <b>RESULTS</b>                |        |                                                                                                                                                                                                                                                             |                                 |
| Study selection               | 16a    | Describe the results of the search and selection process, from the number of records identified in the search to the number of studies included in the review, ideally using a flow diagram.                                                                | Figure 1                        |
|                               | 16b    | Cite studies that might appear to meet the inclusion criteria, but which were excluded, and explain why they were excluded.                                                                                                                                 | Figure 1                        |
| Study characteristics         | 17     | Cite each included study and present its characteristics.                                                                                                                                                                                                   | Supplemental Tables 2-3         |
| Risk of bias in studies       | 18     | Present assessments of risk of bias for each included study.                                                                                                                                                                                                | Supplemental Tables 4-9         |
| Results of individual studies | 19     | For all outcomes, present, for each study: (a) summary statistics for each group (where appropriate) and (b) an effect estimate and its precision (e.g. confidence/credible interval), ideally using structured tables or plots.                            | Supplemental Figures 1-3        |
| Results of syntheses          | 20a    | For each synthesis, briefly summarise the characteristics and risk of bias among contributing studies.                                                                                                                                                      | Supplemental Tables 2-9         |

| Section and Topic                              | Item # | Checklist item                                                                                                                                                                                                                                                                       | Location where item is reported |
|------------------------------------------------|--------|--------------------------------------------------------------------------------------------------------------------------------------------------------------------------------------------------------------------------------------------------------------------------------------|---------------------------------|
|                                                | 20b    | Present results of all statistical syntheses conducted. If meta-analysis was done, present for each the summary estimate and its precision (e.g. confidence/credible interval) and measures of statistical heterogeneity. If comparing groups, describe the direction of the effect. | Lines 346-357                   |
|                                                | 20c    | Present results of all investigations of possible causes of heterogeneity among study results.                                                                                                                                                                                       | Lines 358-368                   |
|                                                | 20d    | Present results of all sensitivity analyses conducted to assess the robustness of the synthesized results.                                                                                                                                                                           |                                 |
| Reporting biases                               | 21     | Present assessments of risk of bias due to missing results (arising from reporting biases) for each synthesis assessed.                                                                                                                                                              | Lines 360-368                   |
| Certainty of evidence                          | 22     | Present assessments of certainty (or confidence) in the body of evidence for each outcome assessed.                                                                                                                                                                                  | Lines 370-378                   |
| <b>DISCUSSION</b>                              |        |                                                                                                                                                                                                                                                                                      |                                 |
| Discussion                                     | 23a    | Provide a general interpretation of the results in the context of other evidence.                                                                                                                                                                                                    | Lines 386-395                   |
|                                                | 23b    | Discuss any limitations of the evidence included in the review.                                                                                                                                                                                                                      | Lines 442-496                   |
|                                                | 23c    | Discuss any limitations of the review processes used.                                                                                                                                                                                                                                | Lines 442-496                   |
|                                                | 23d    | Discuss implications of the results for practice, policy, and future research.                                                                                                                                                                                                       | Lines 396-440                   |
| <b>OTHER INFORMATION</b>                       |        |                                                                                                                                                                                                                                                                                      |                                 |
| Registration and protocol                      | 24a    | Provide registration information for the review, including register name and registration number, or state that the review was not registered.                                                                                                                                       | Line 62                         |
|                                                | 24b    | Indicate where the review protocol can be accessed, or state that a protocol was not prepared.                                                                                                                                                                                       | Line 62                         |
|                                                | 24c    | Describe and explain any amendments to information provided at registration or in the protocol.                                                                                                                                                                                      | N/A                             |
| Support                                        | 25     | Describe sources of financial or non-financial support for the review, and the role of the funders or sponsors in the review.                                                                                                                                                        | Additional page                 |
| Competing interests                            | 26     | Declare any competing interests of review authors.                                                                                                                                                                                                                                   | Additional page                 |
| Availability of data, code and other materials | 27     | Report which of the following are publicly available and where they can be found: template data collection forms; data extracted from included studies; data used for all analyses; analytic code; any other materials used in the review.                                           | Supplemental Tables 1-9         |

From: Page MJ, McKenzie JE, Bossuyt PM, Boutron I, Hoffmann TC, Mulrow CD, et al. The PRISMA 2020 statement: an updated guideline for reporting systematic reviews. *BMJ* 2021;372:n71. doi: 10.1136/bmj.n71

For more information, visit: <http://www.prisma-statement.org/>
