# Supplementary material
Source: HighWire-hosted journal article supplement (https://bjsm.bmj.com/content/58/5/278)

*Supplementary Figure 1: Non-Significant Moderation by NCAA Division*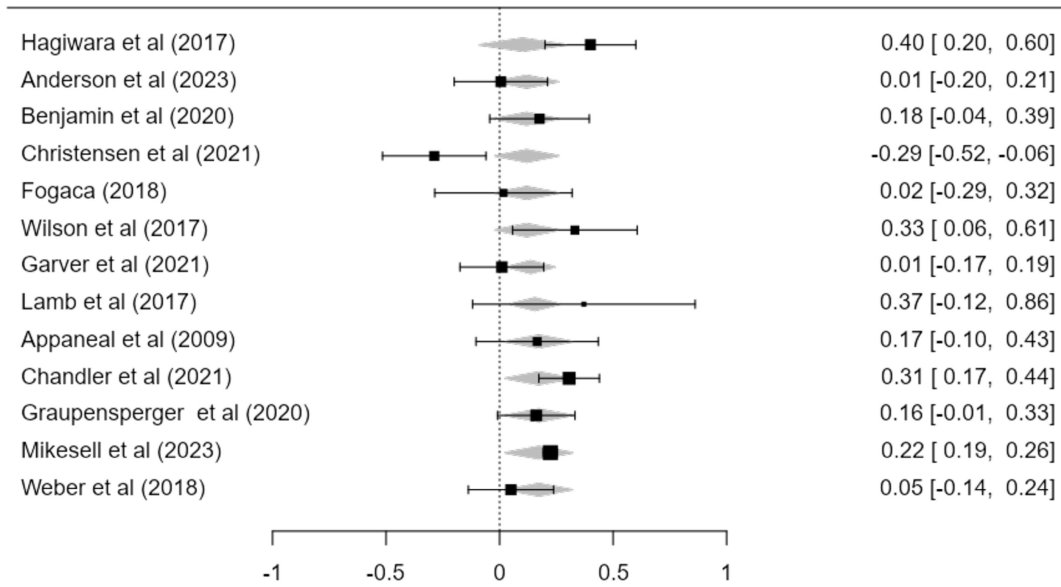

Supplementary Figure 2: Non-Significant Moderation by Sport

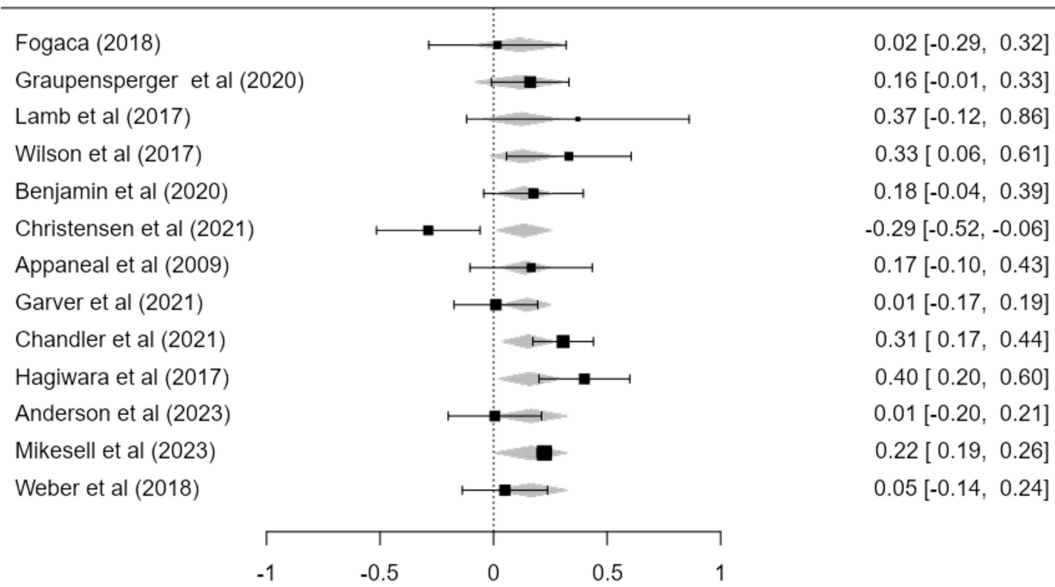

*Supplementary Figure 3: Non-Significant Moderation by Determinant*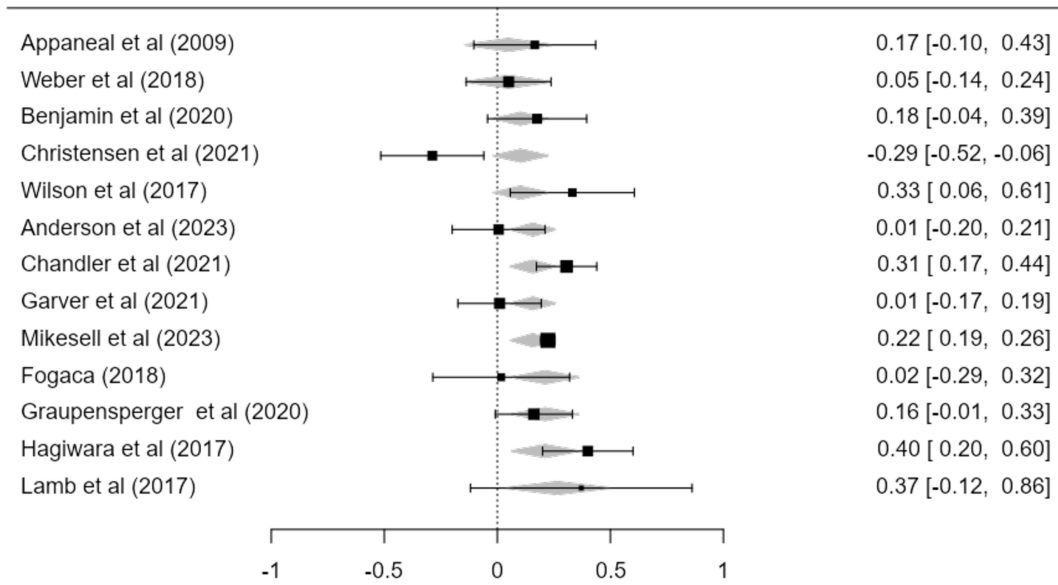

Supplement: inline-supplementary-material-2 [file inline-supplementary-material-2.pdf]
